# Supplementary material for: The U-box family genes in Medicago truncatula: Key elements in response to salt, cold, and drought stresses
Source: PubMed Central journal article supplement (PMC5542650; doi:10.1371/journal.pone.0182402), 2017-08-03
Supplement: pone.0182402.s003.pdf [file pone.0182402.s003.pdf]

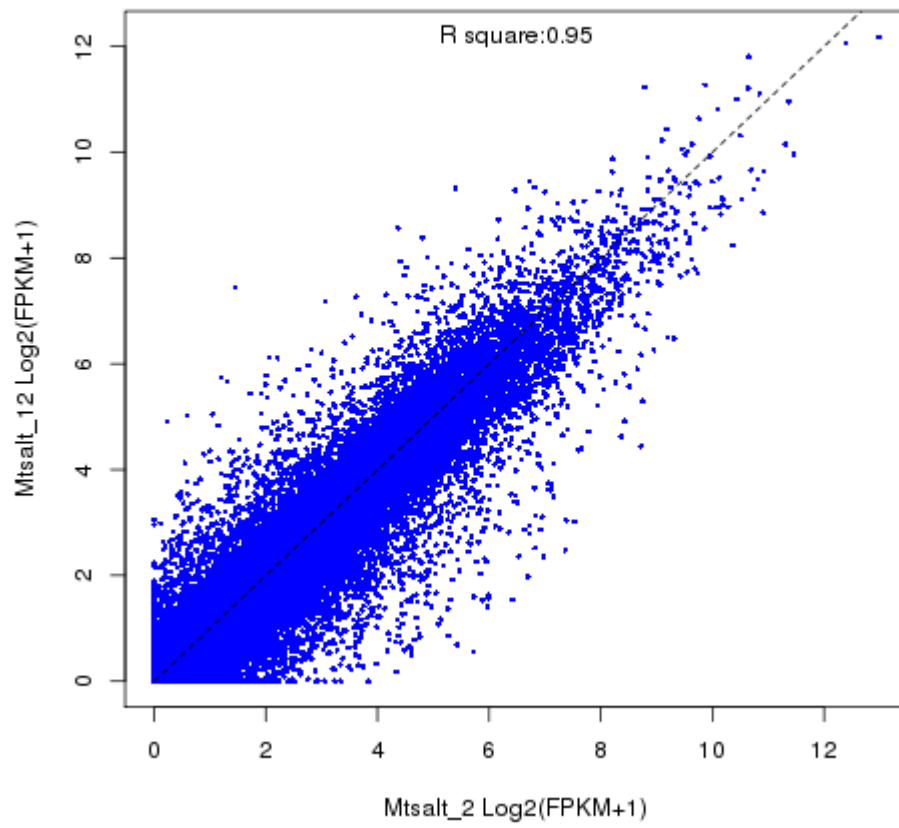

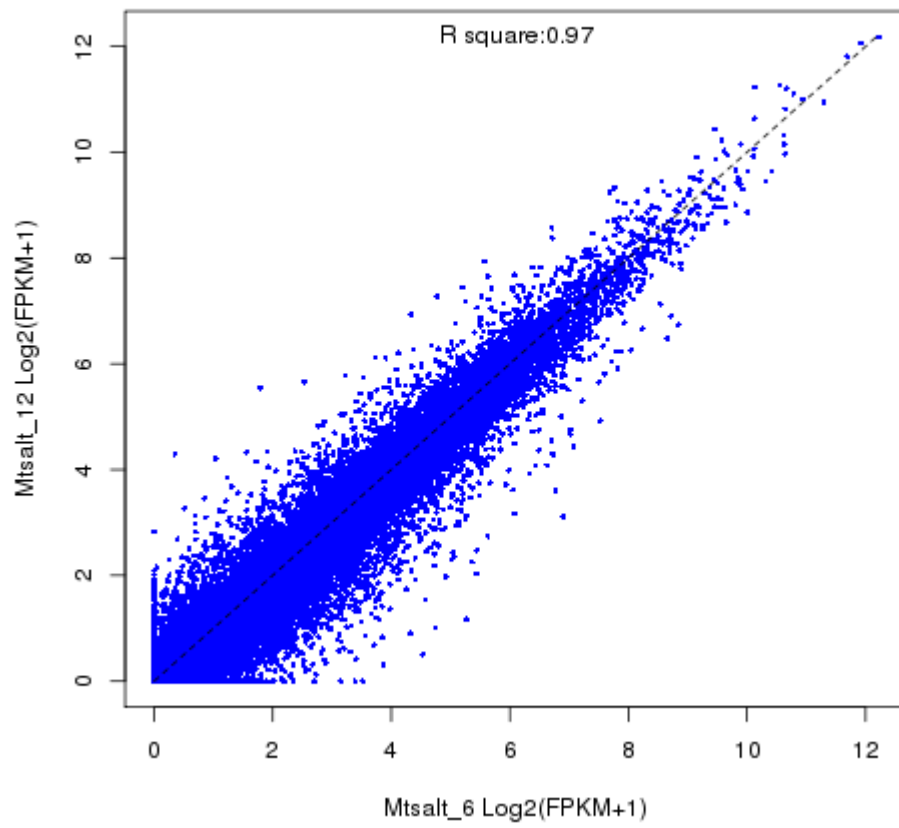

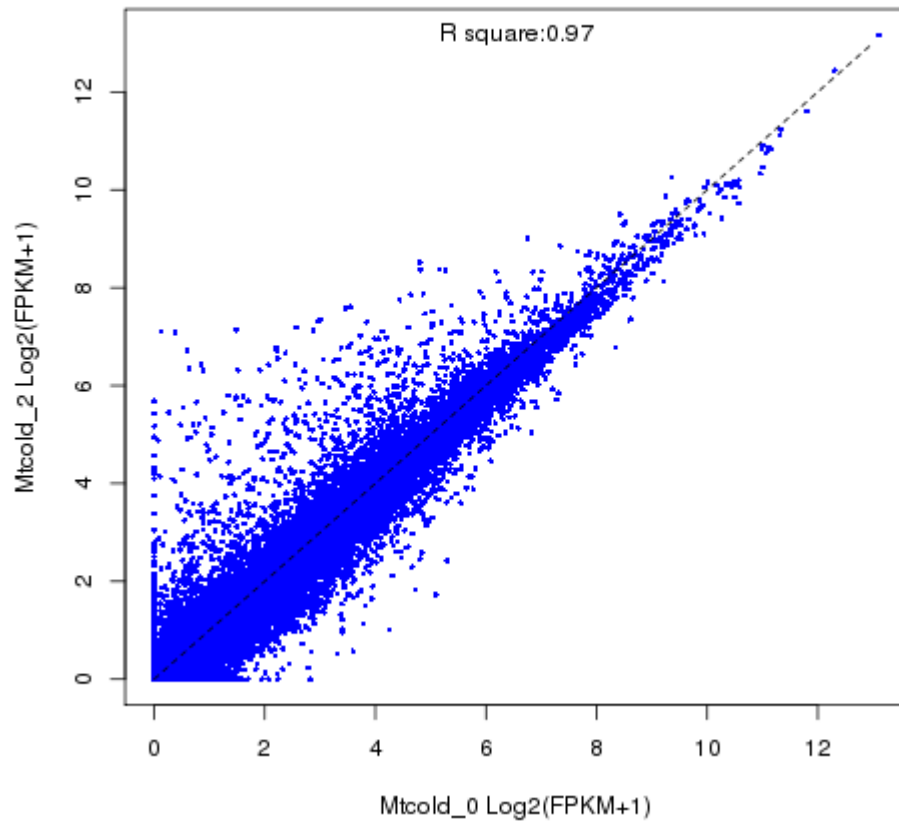

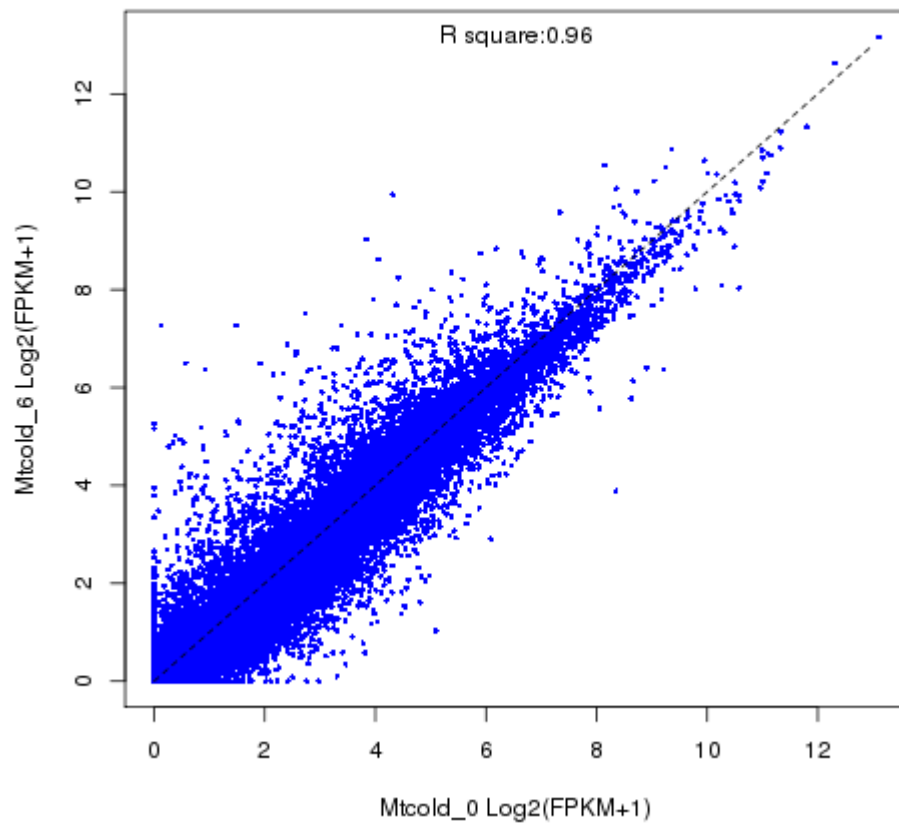

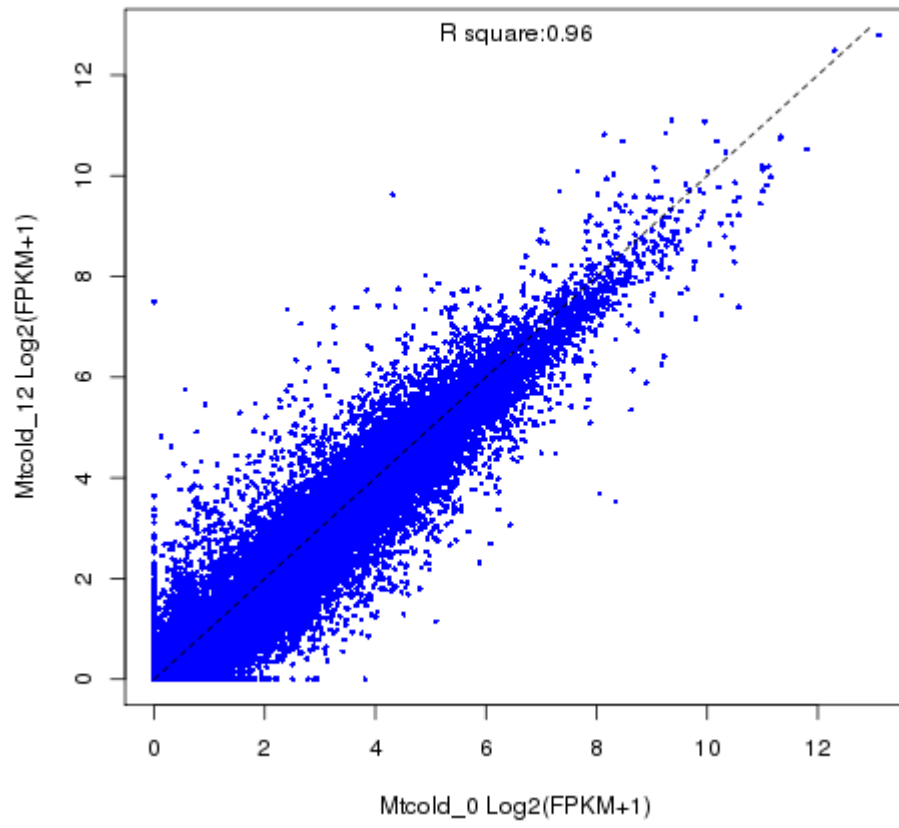

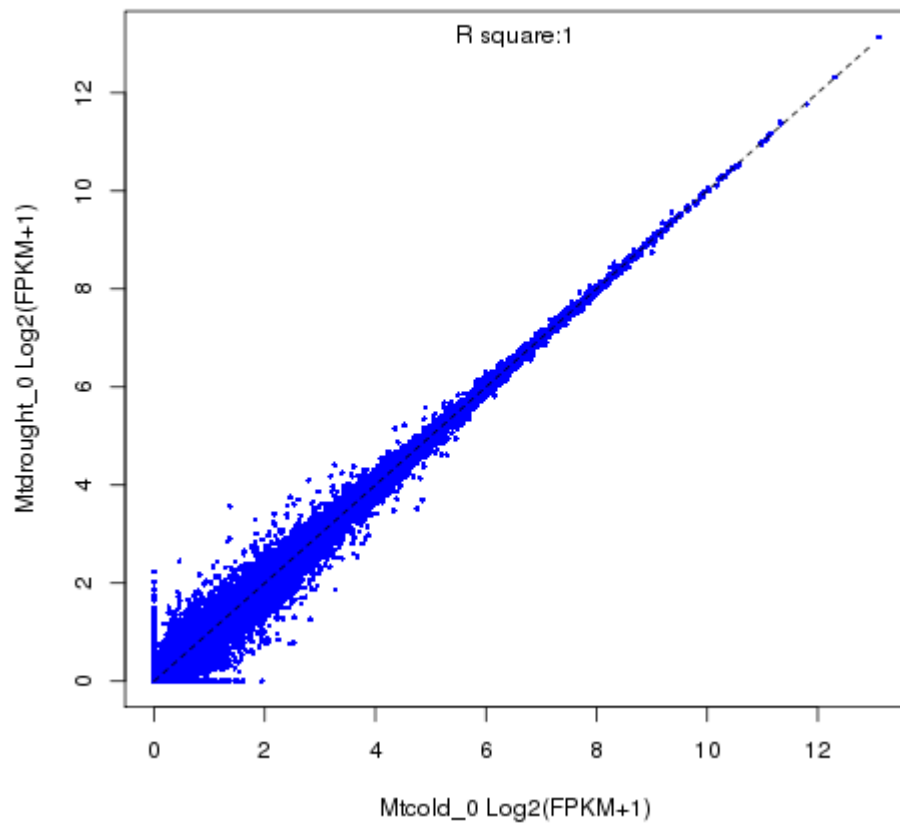

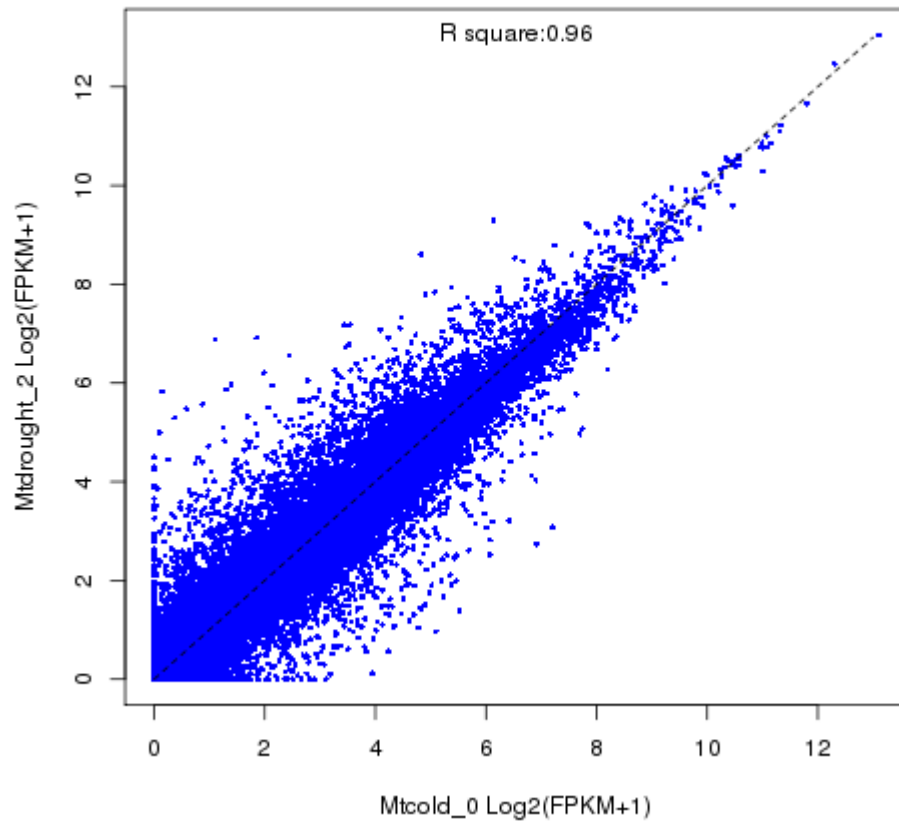

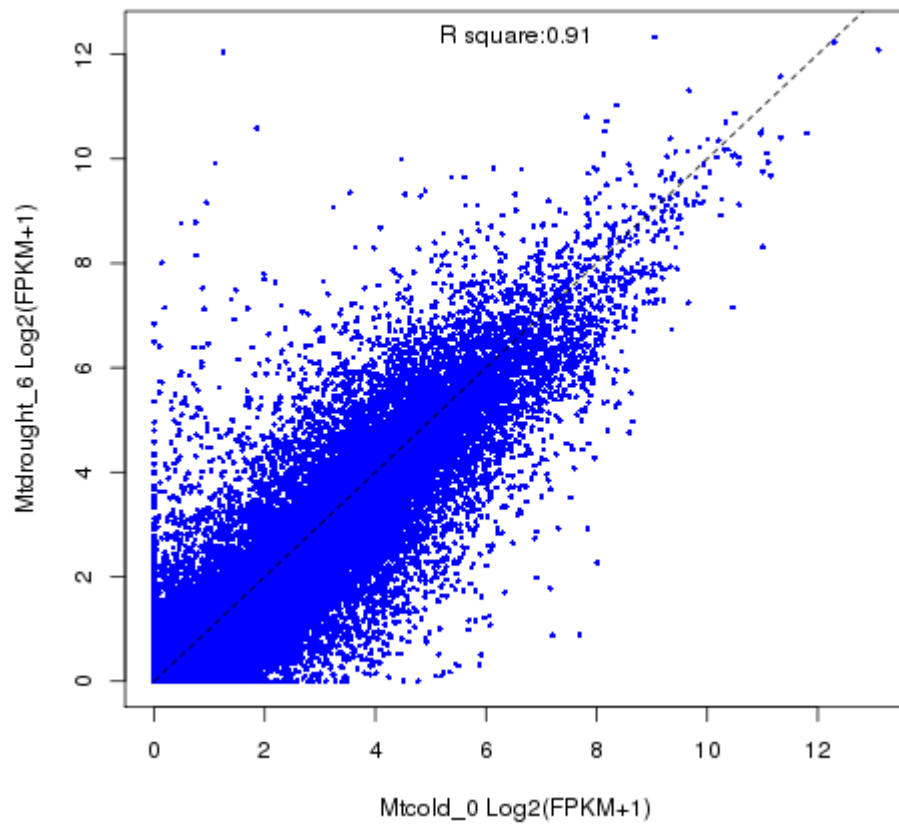



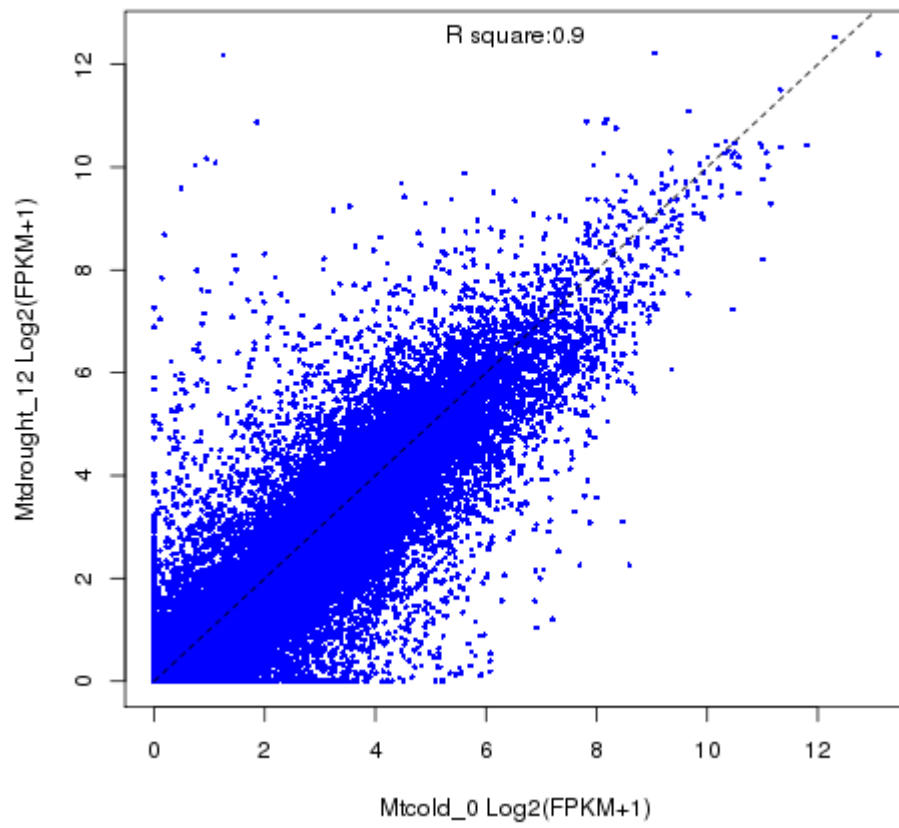

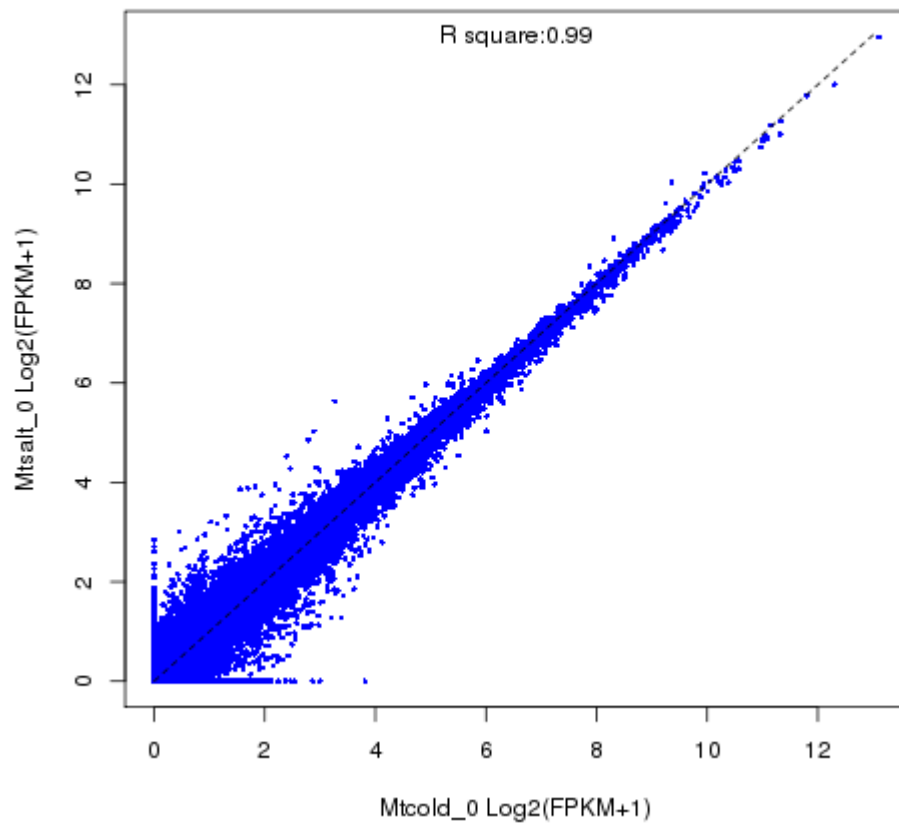

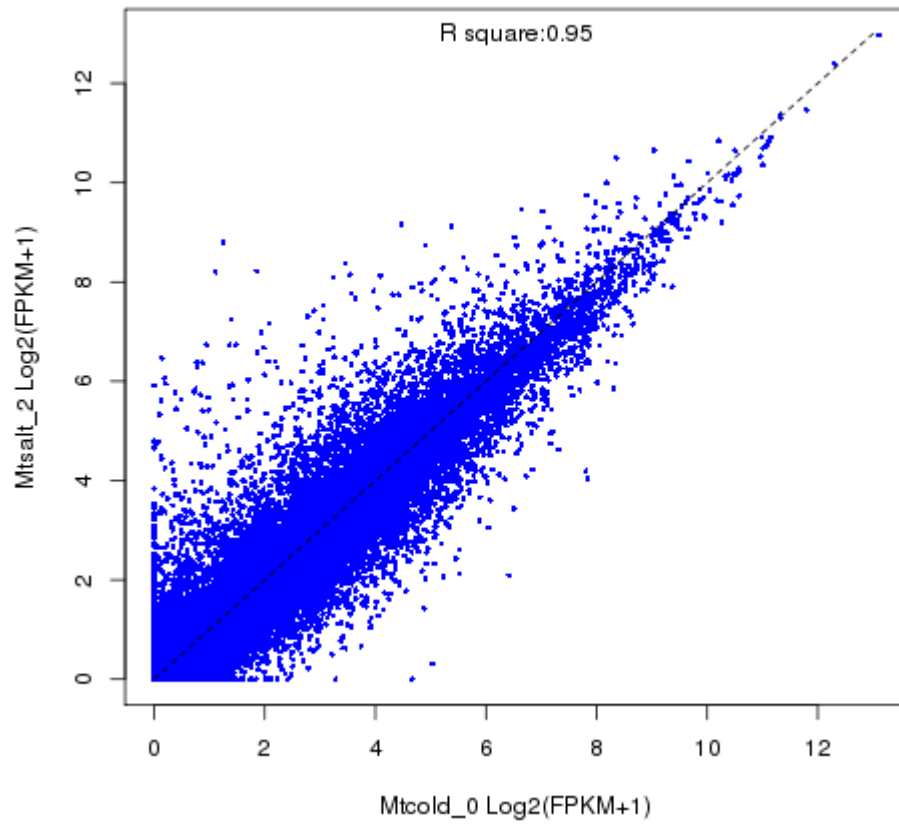

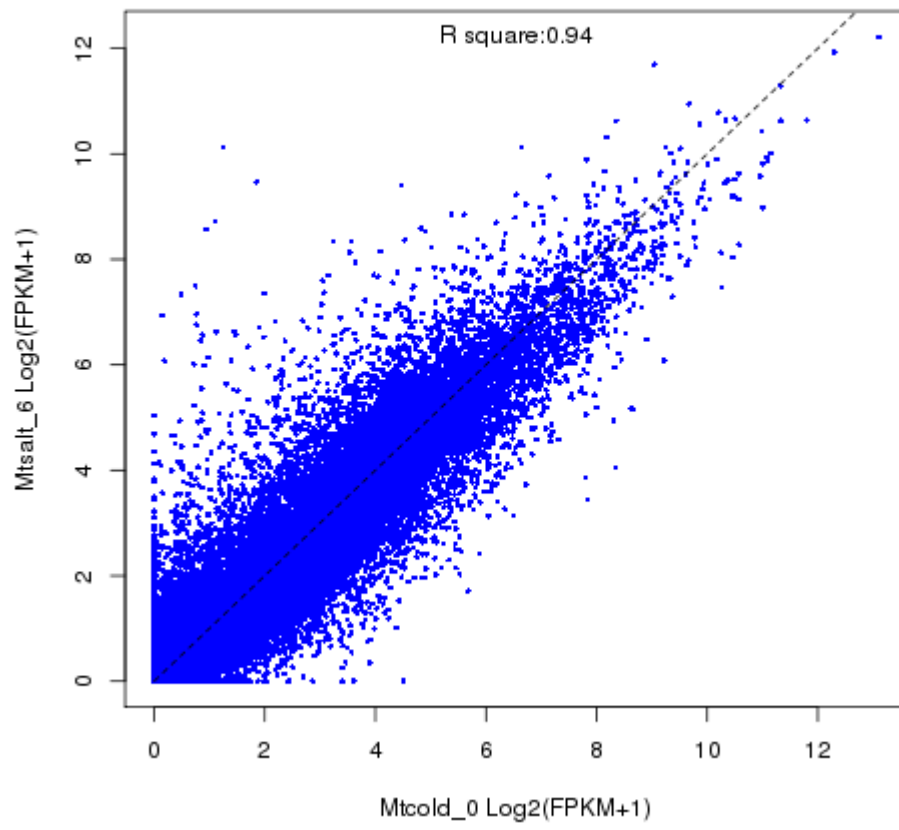

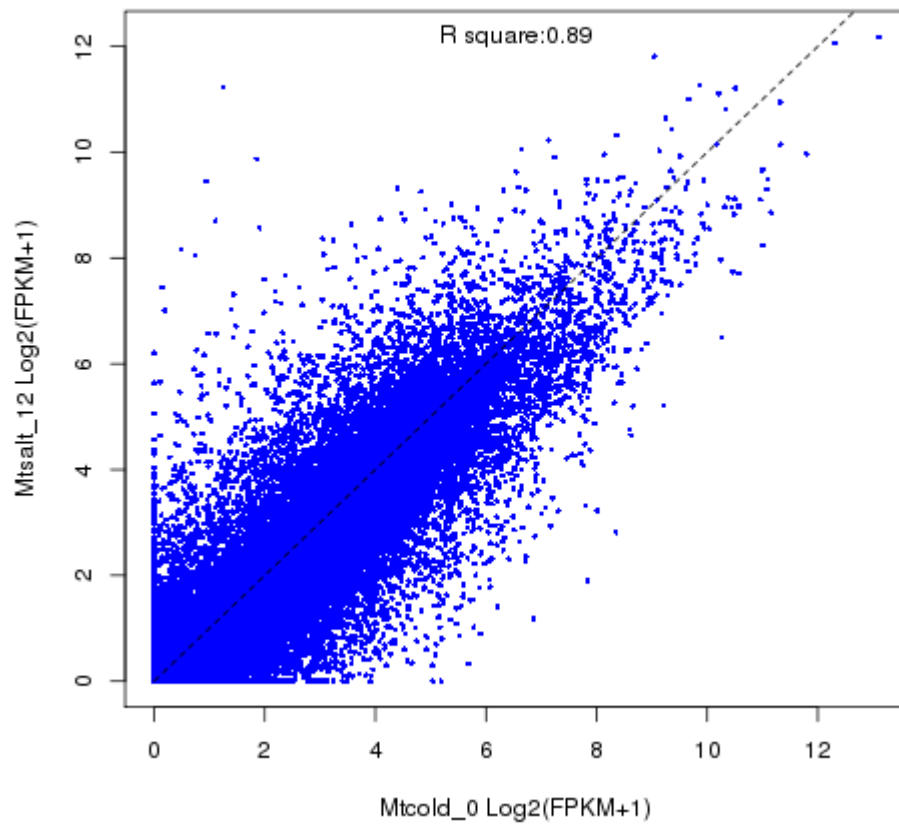

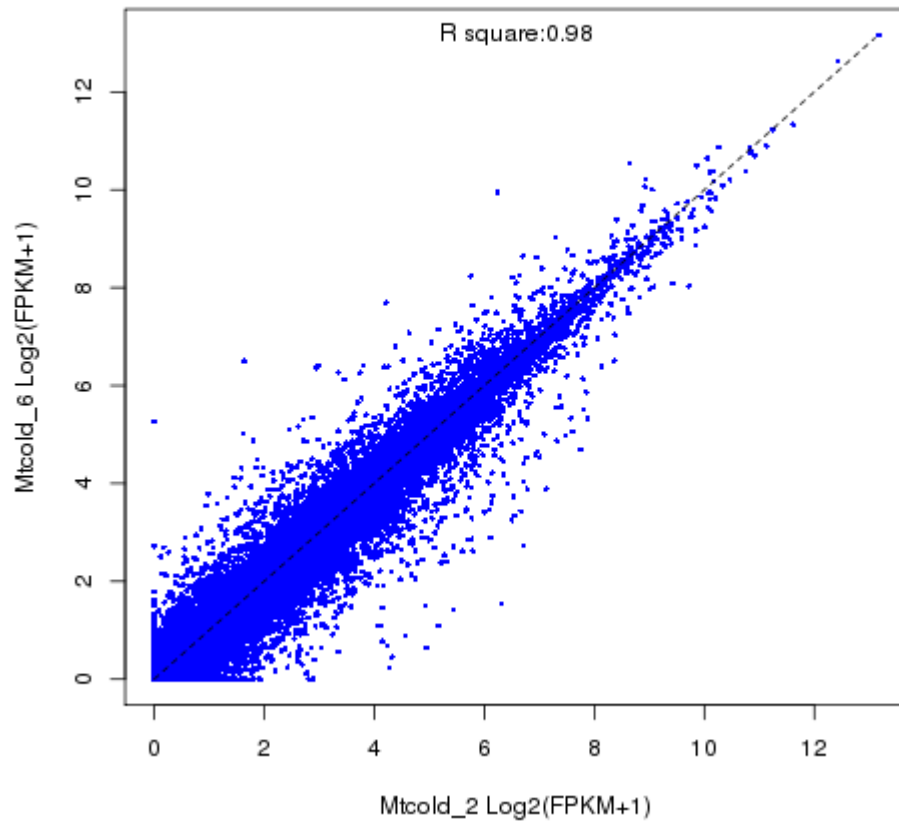

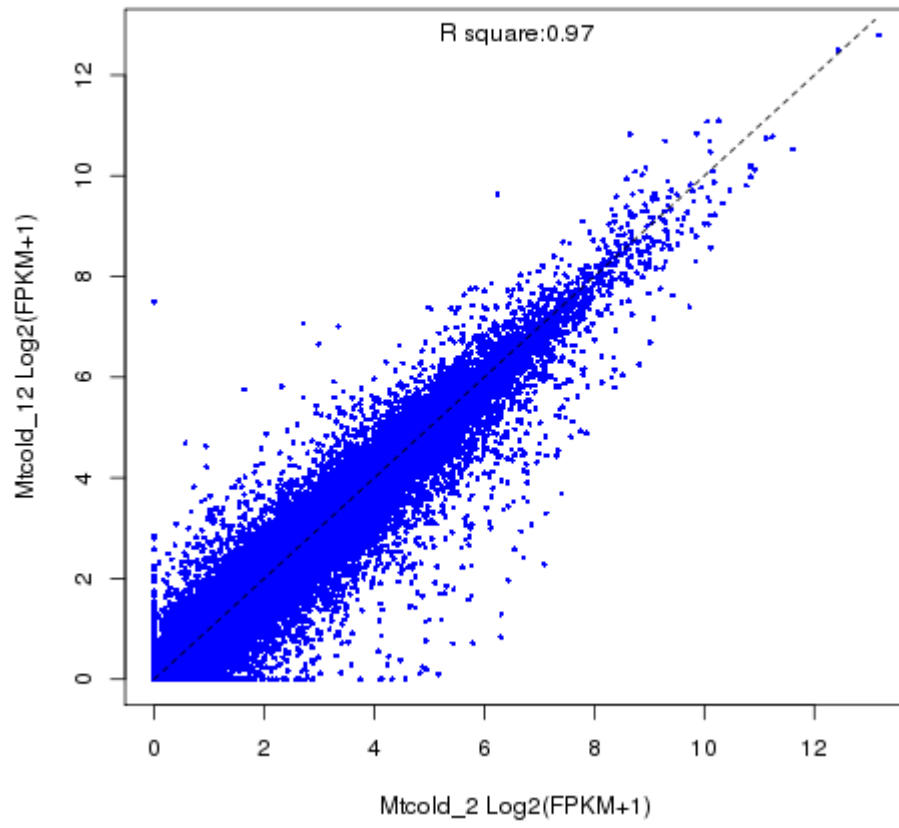

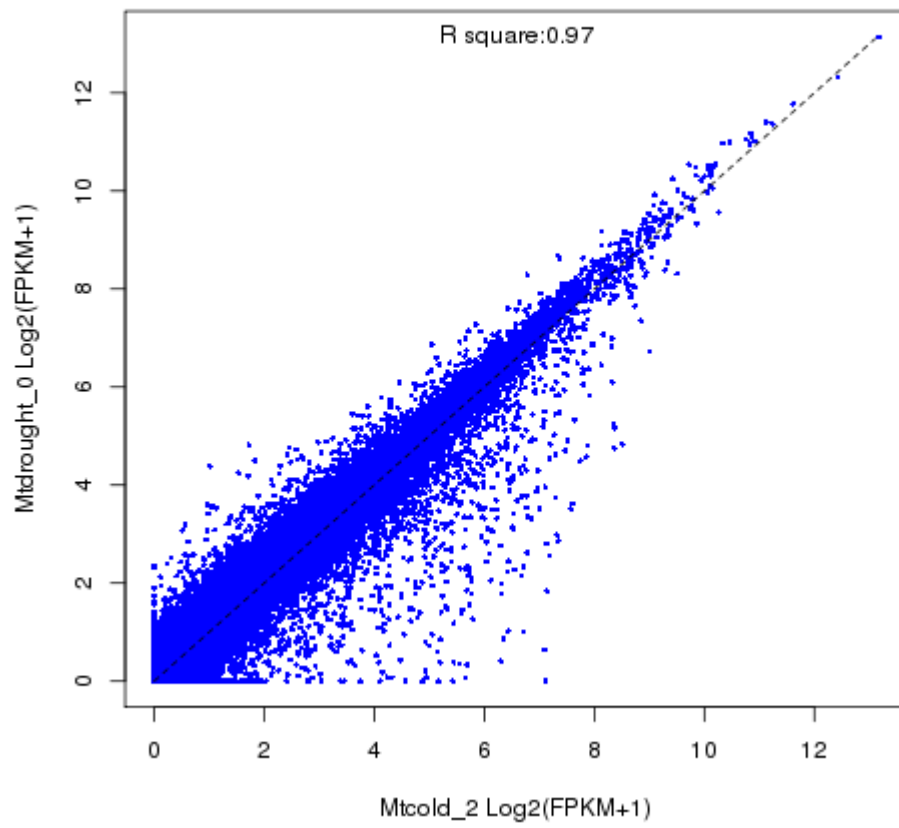



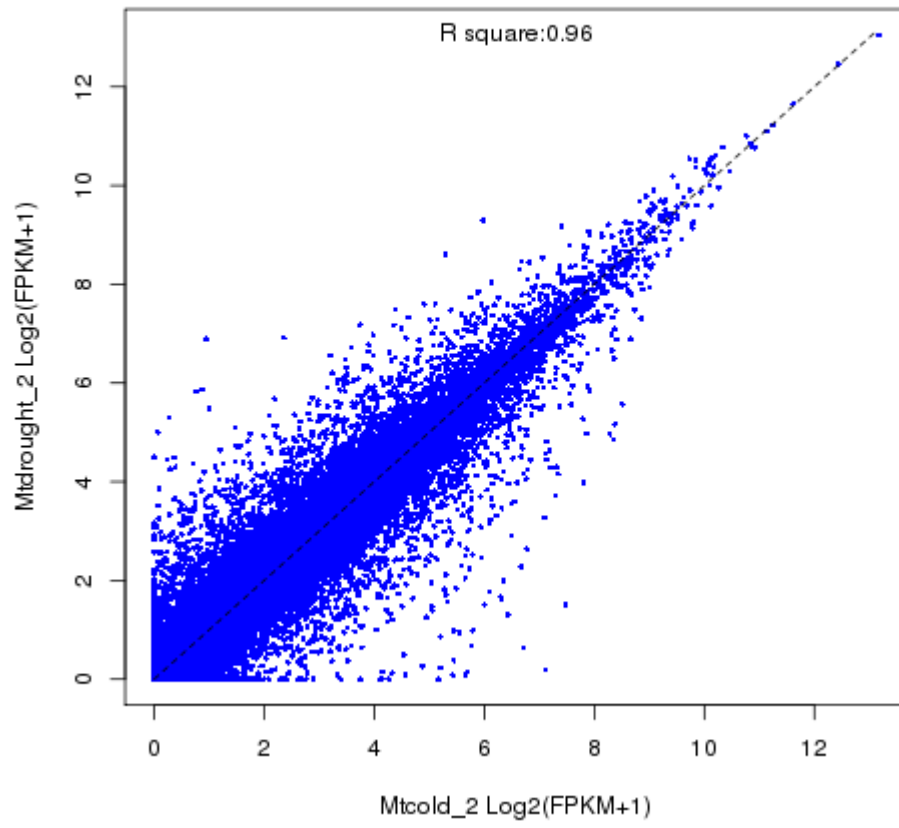

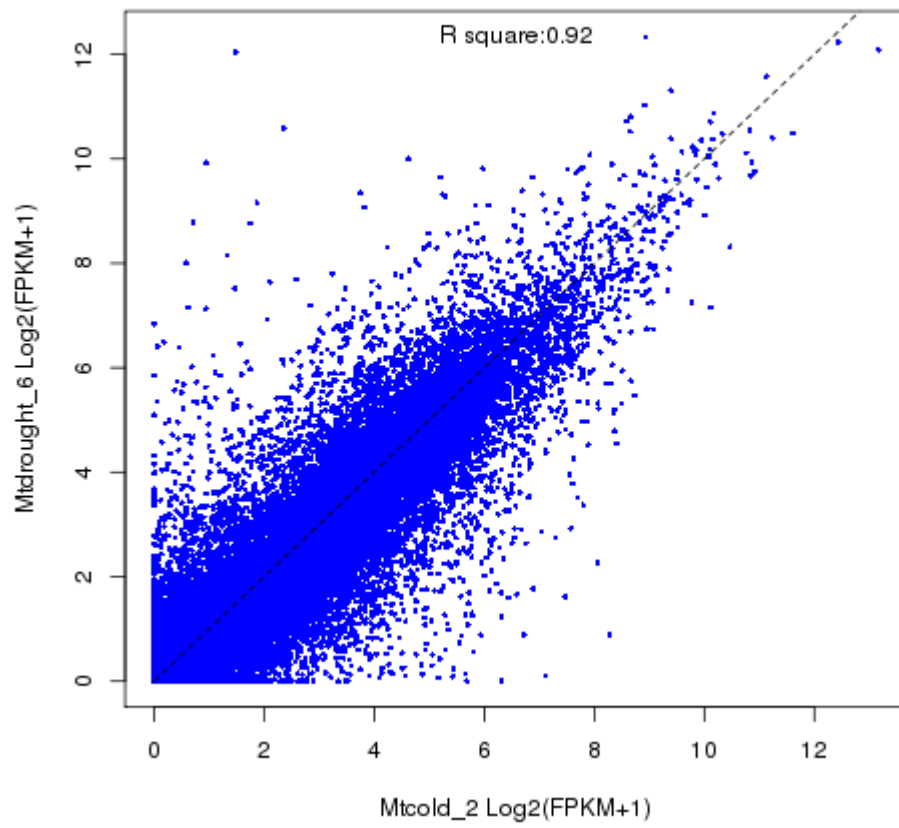

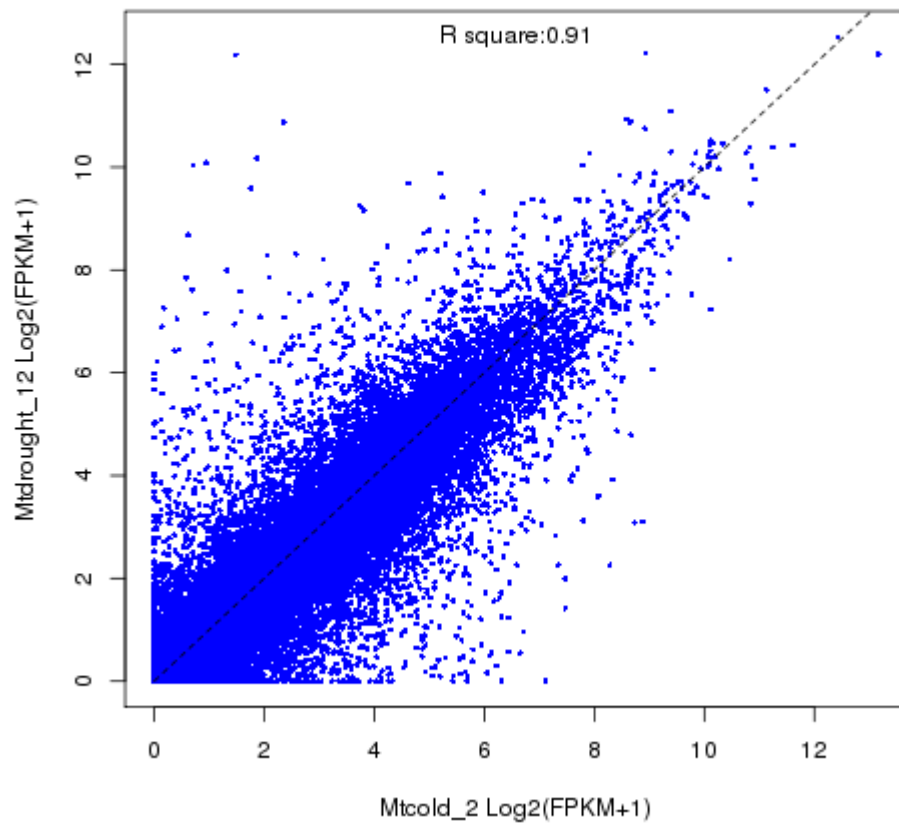

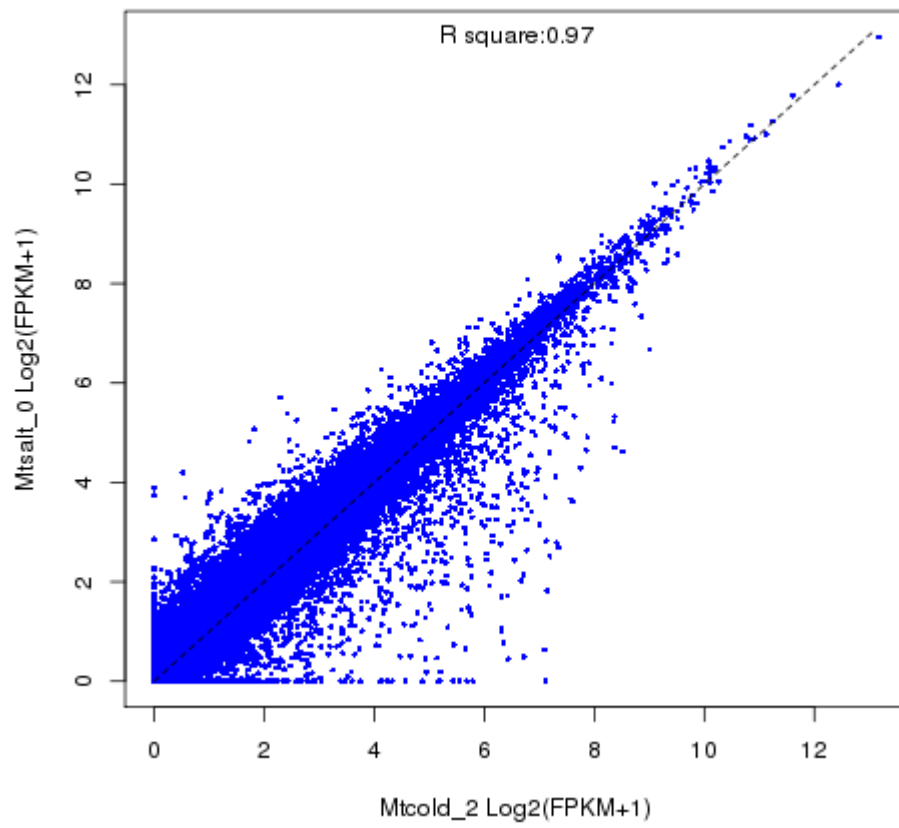

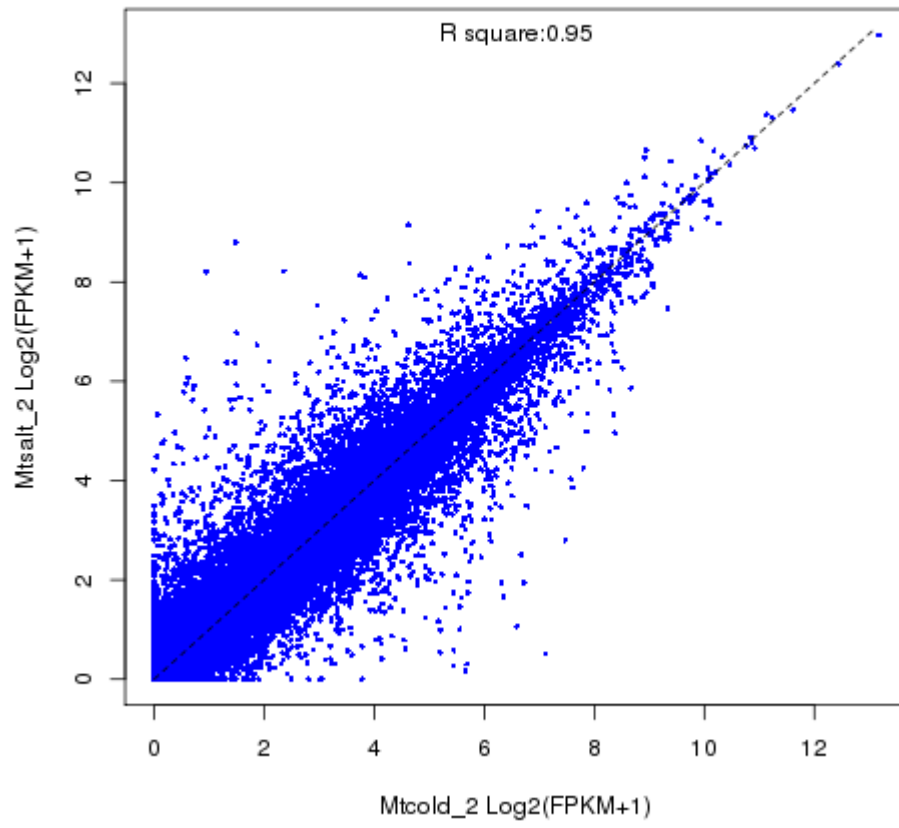

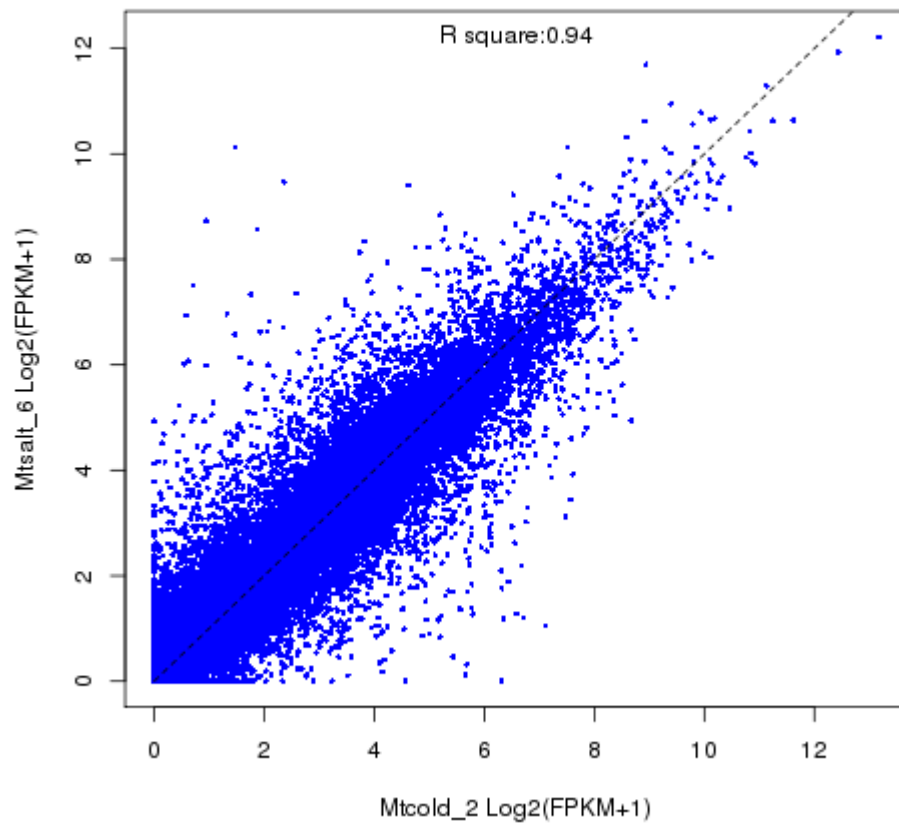

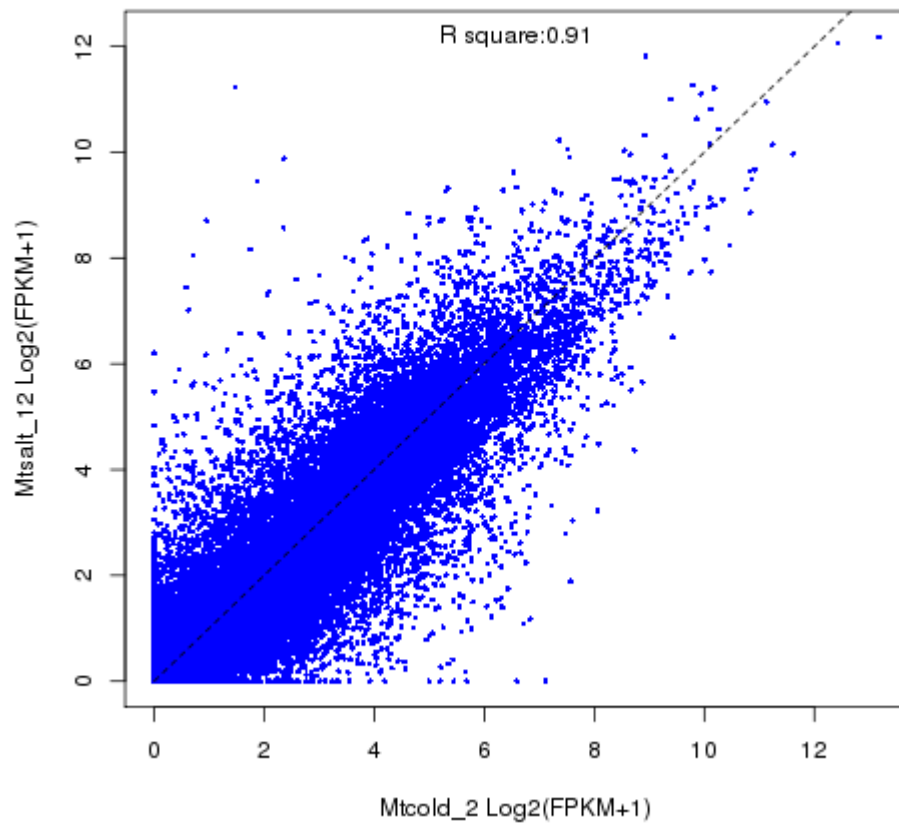

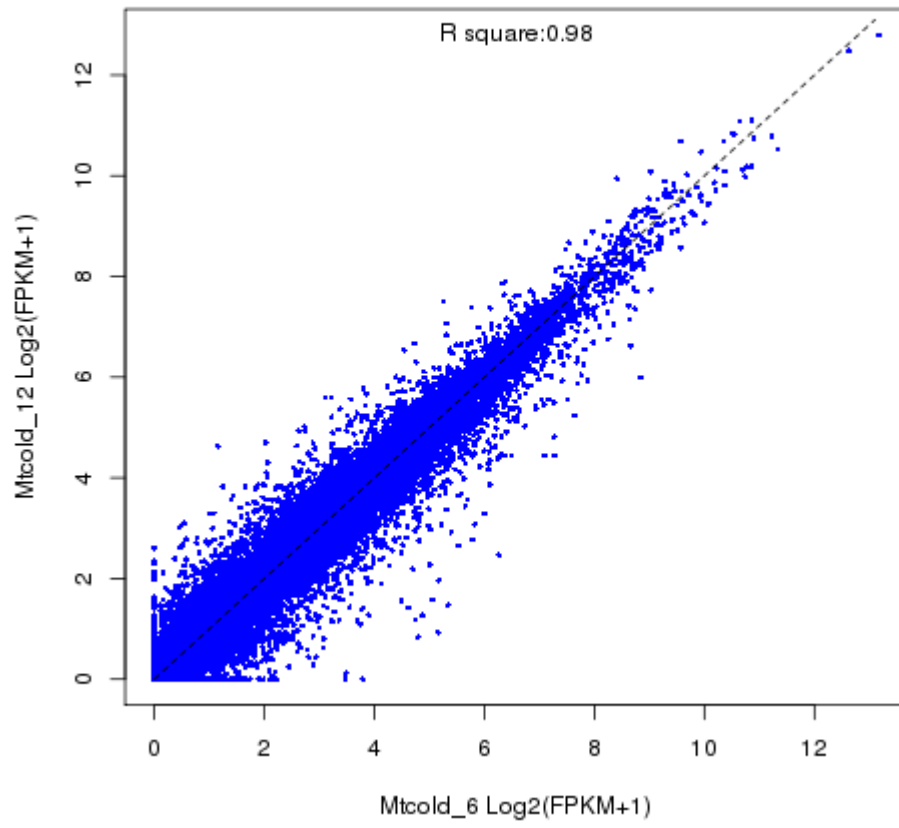



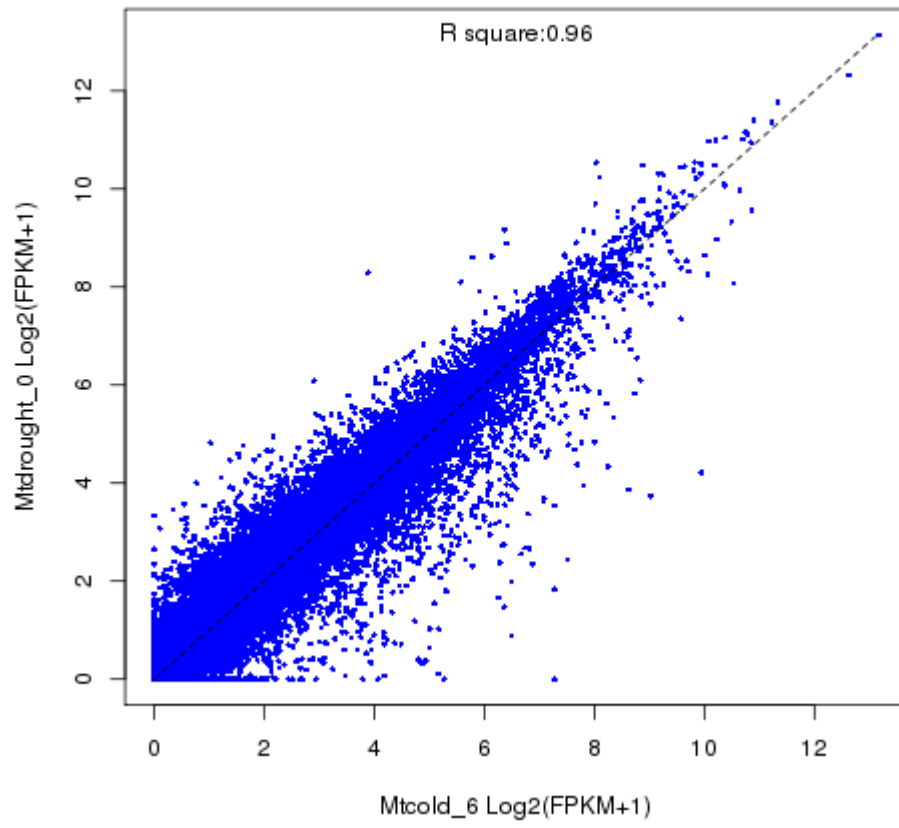

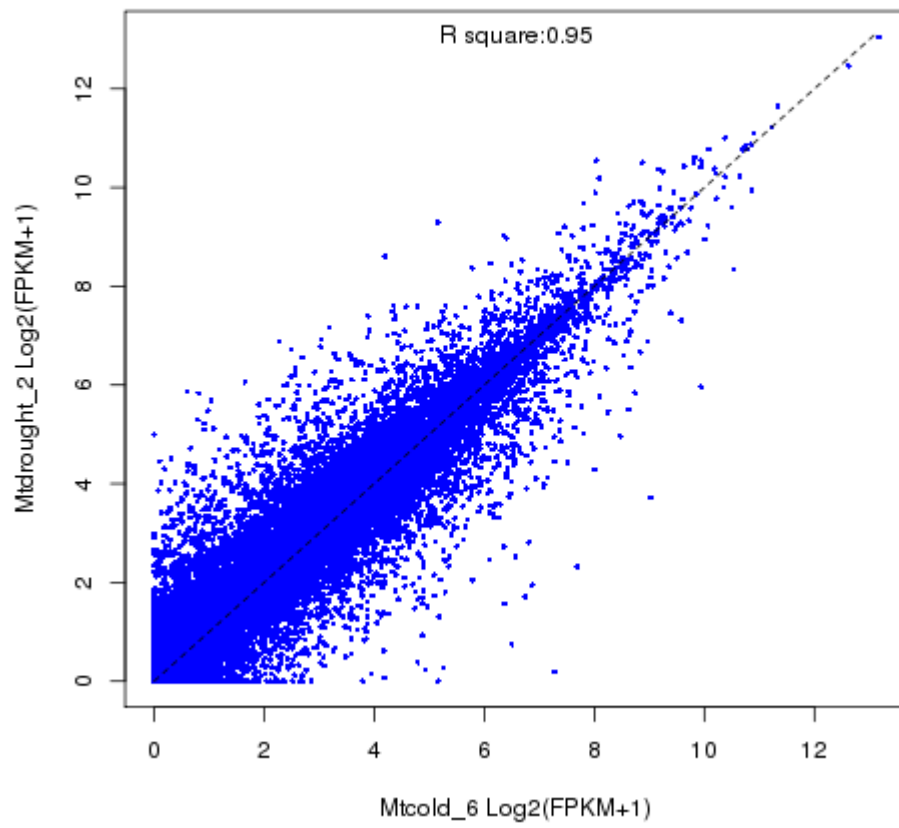

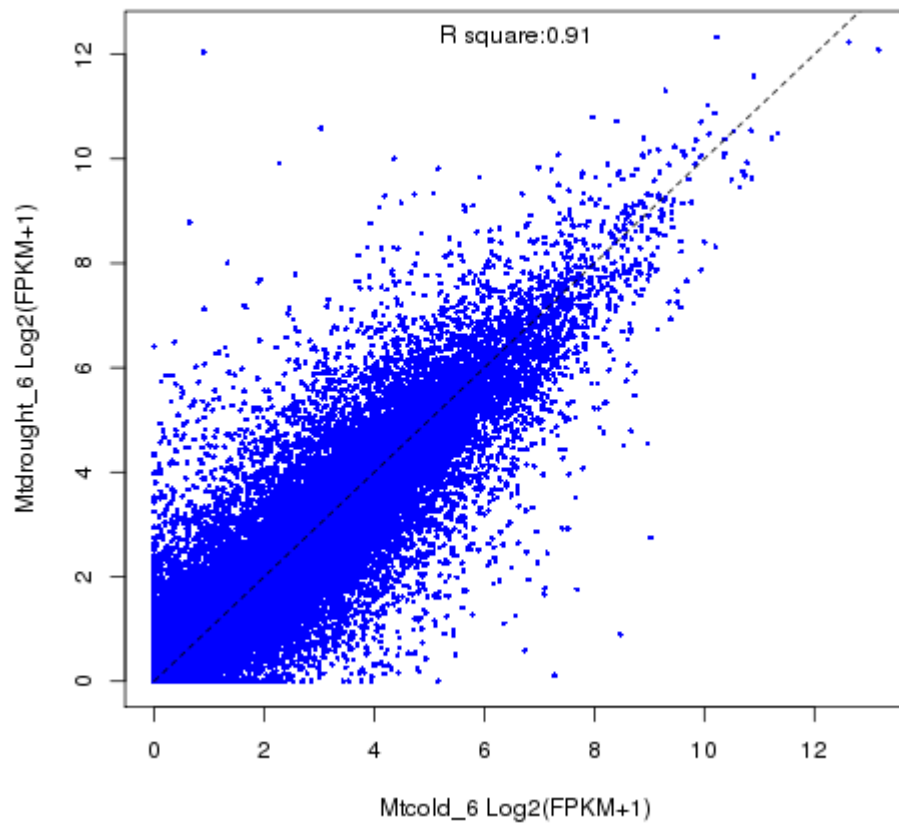

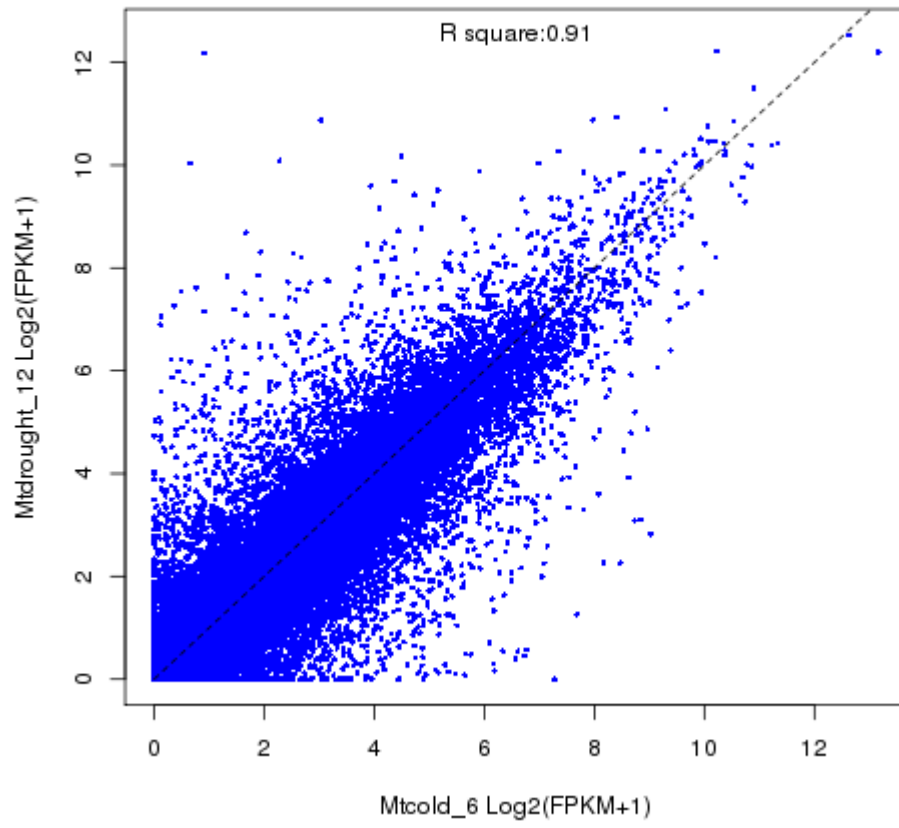

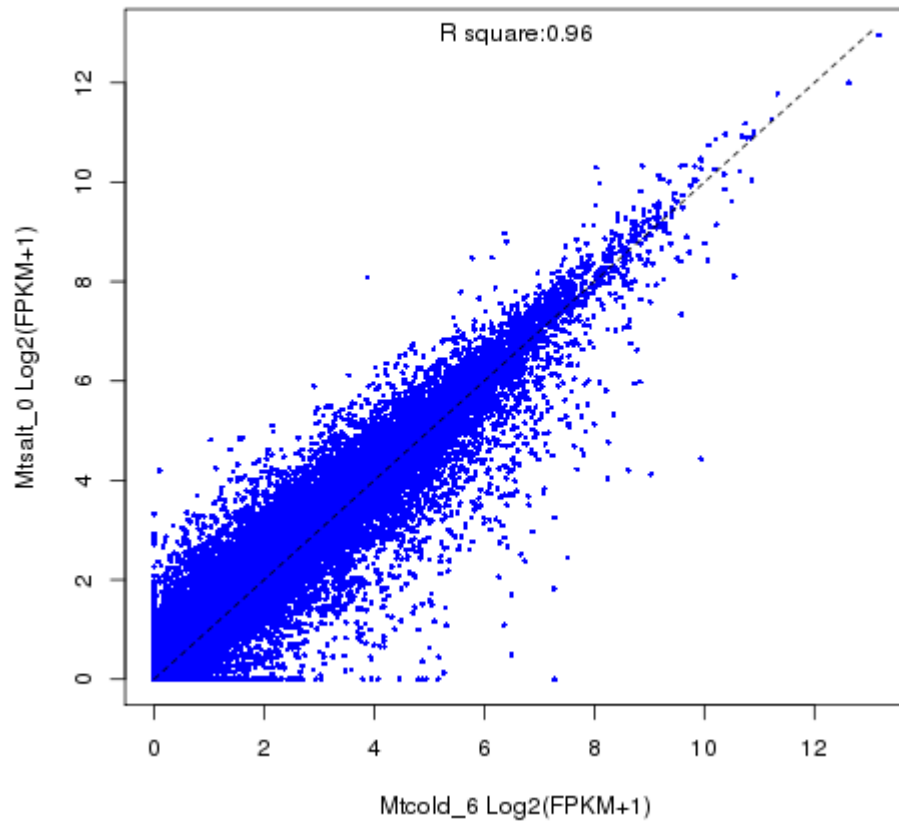

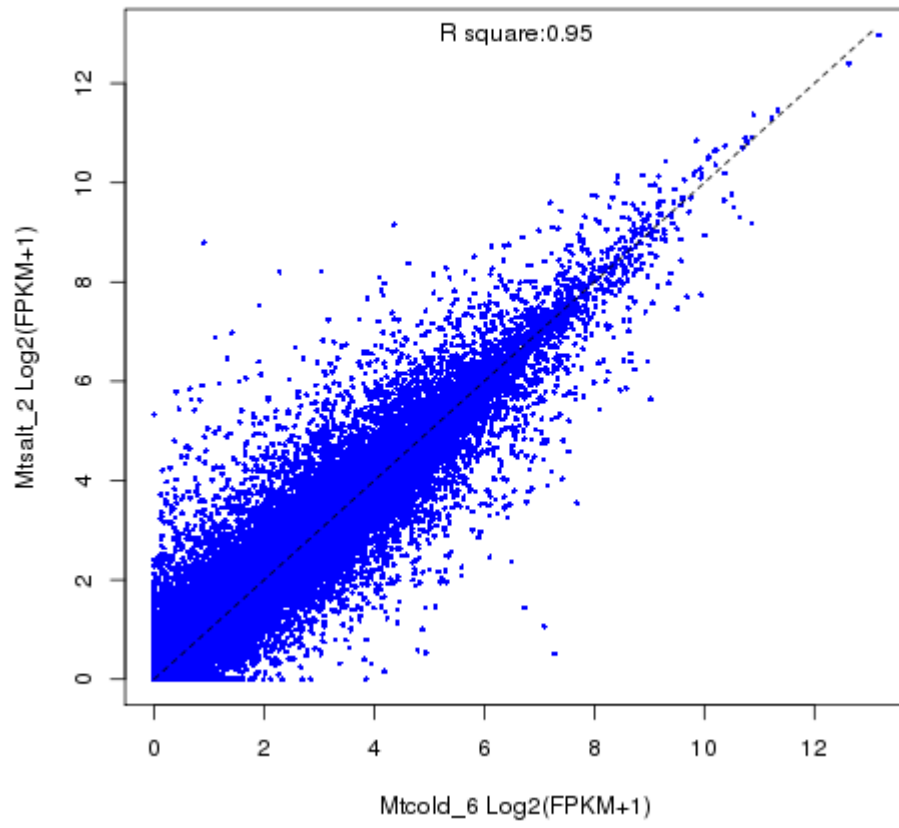

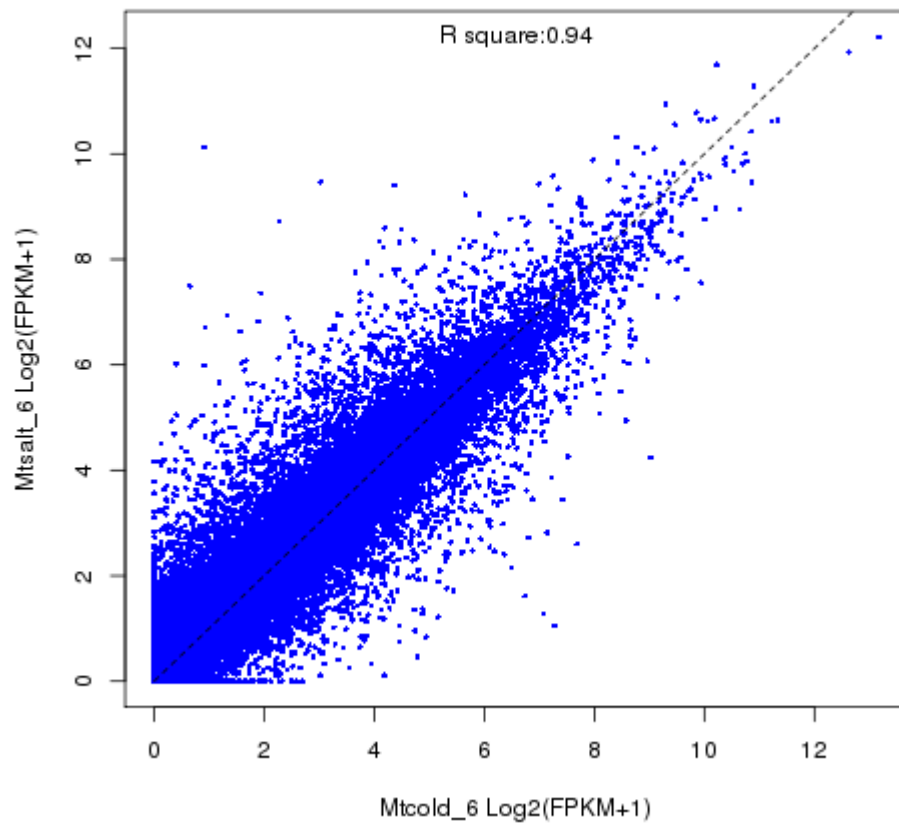

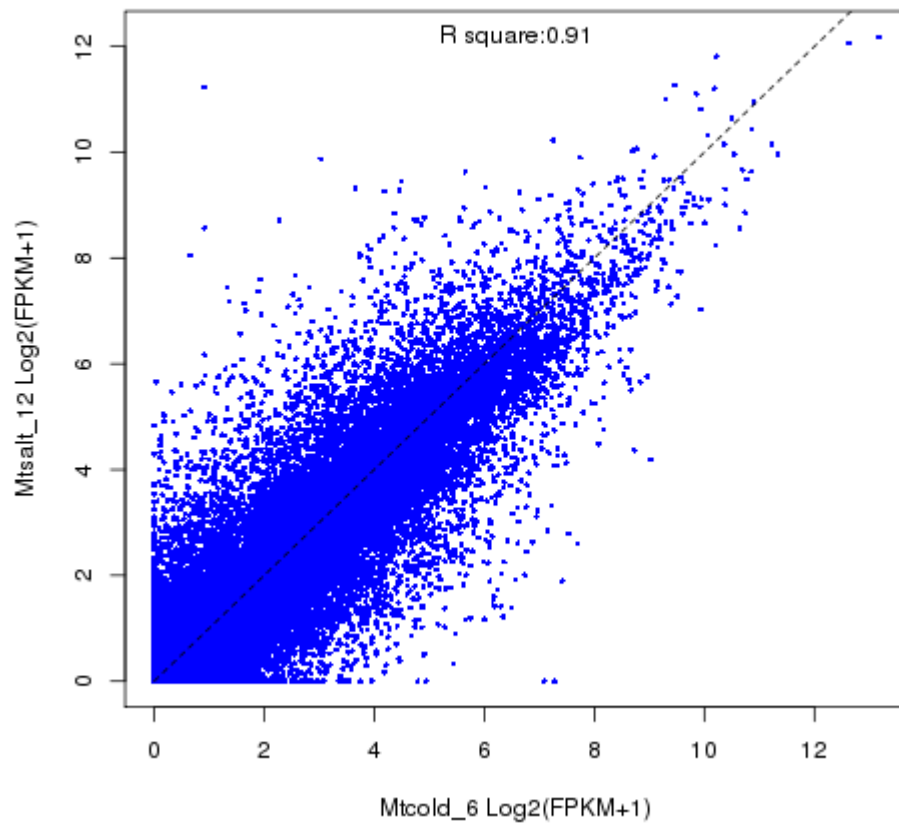



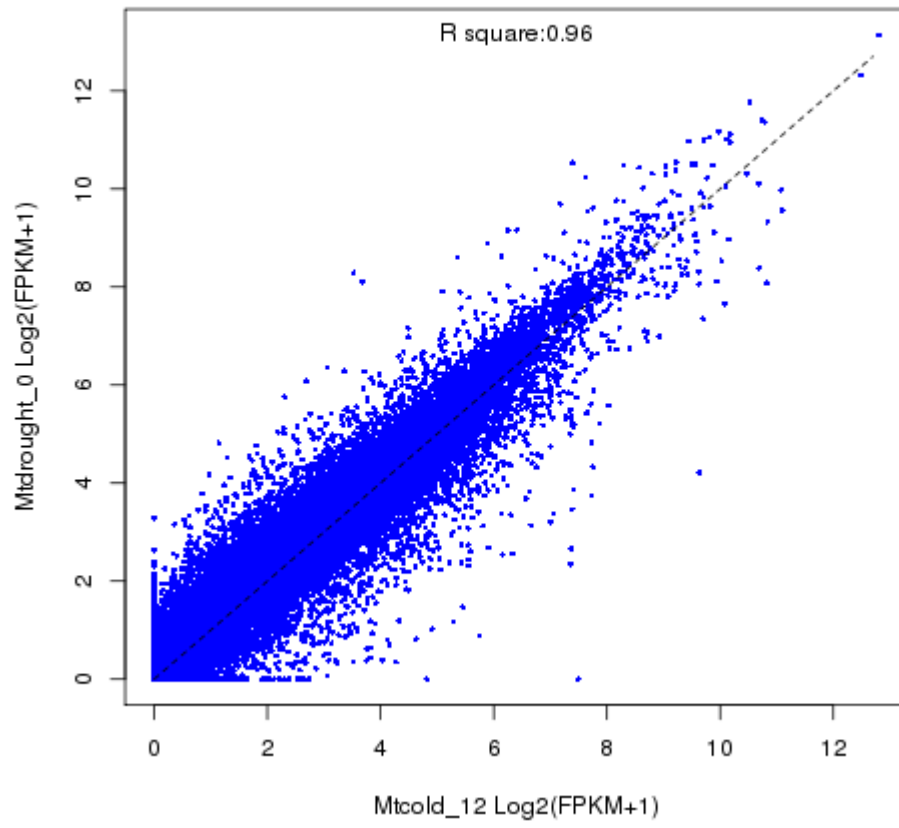

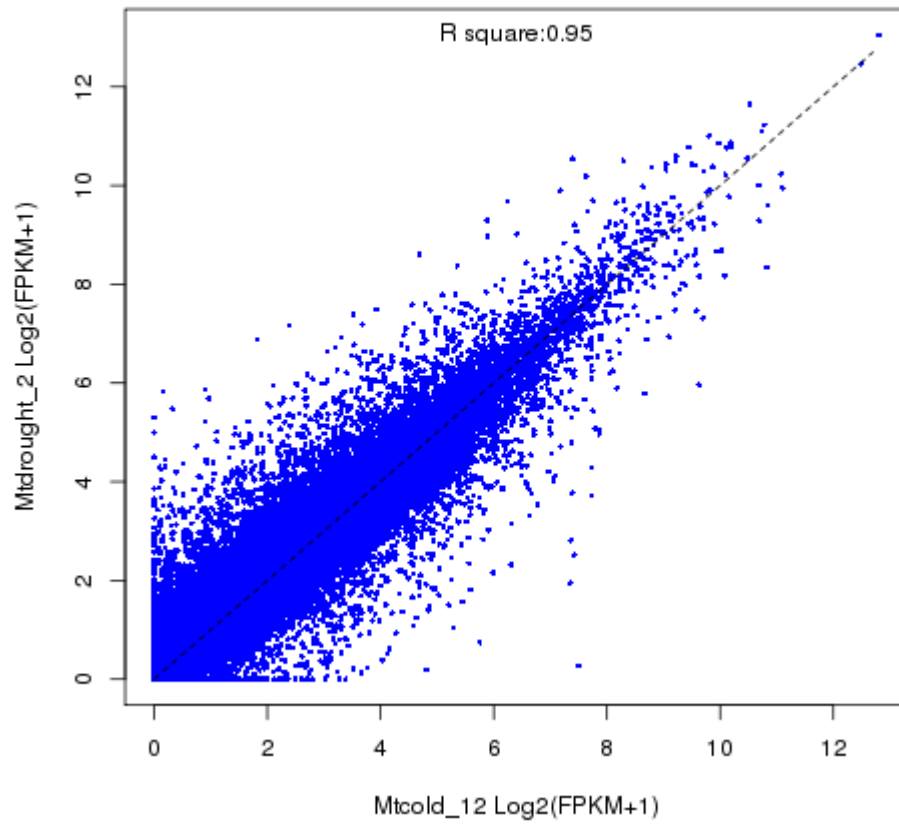

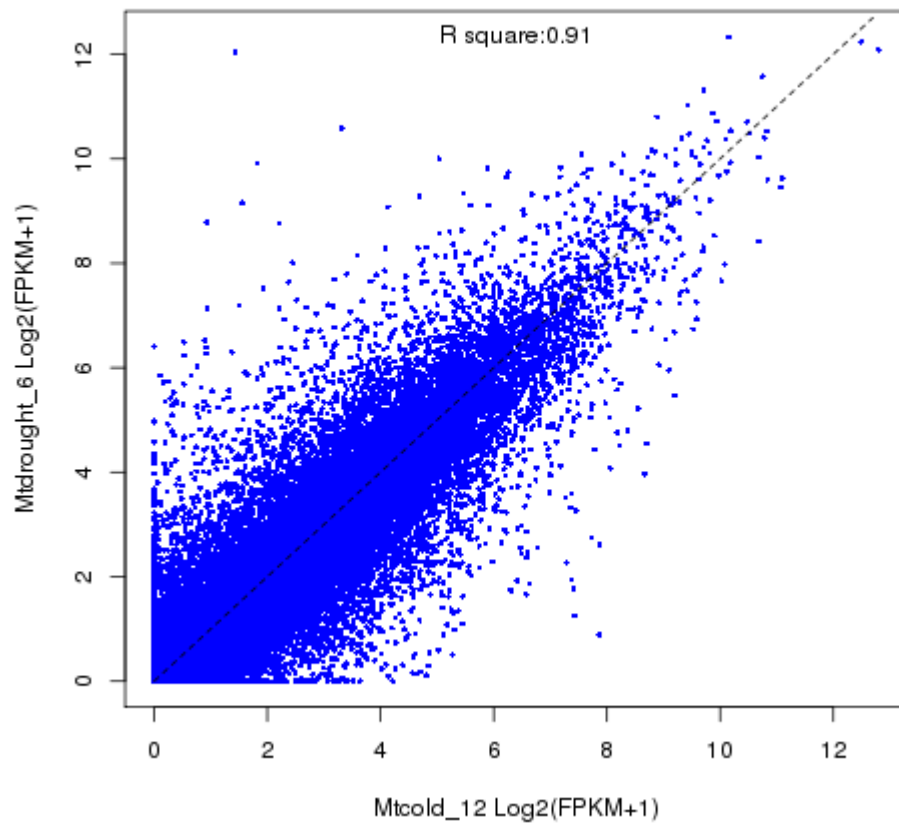

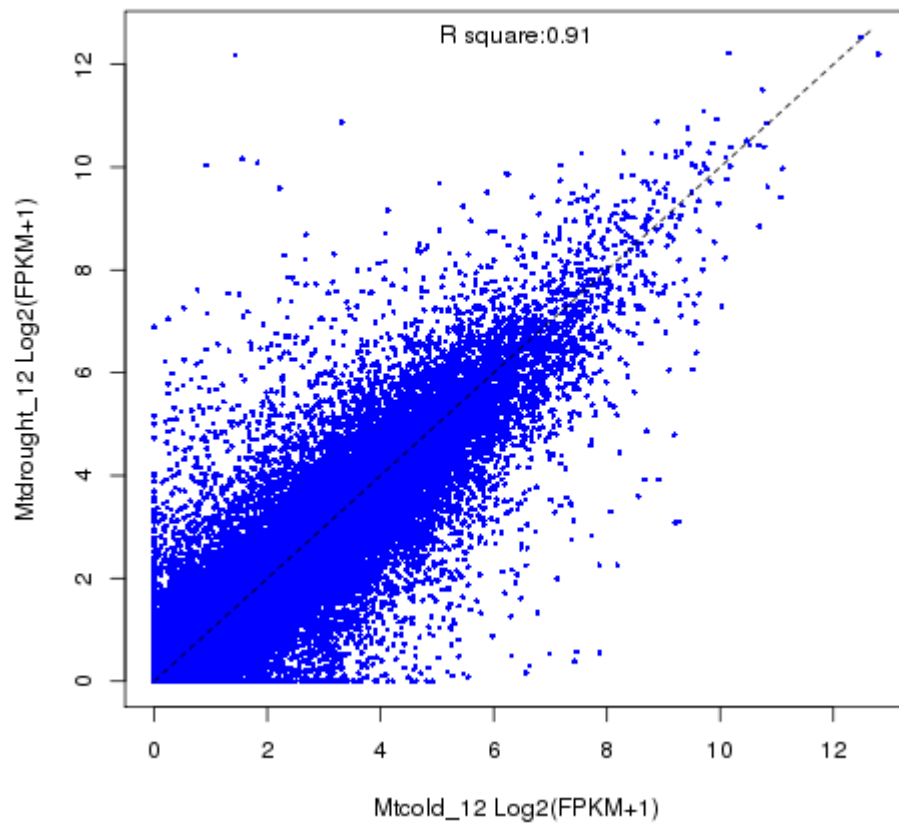

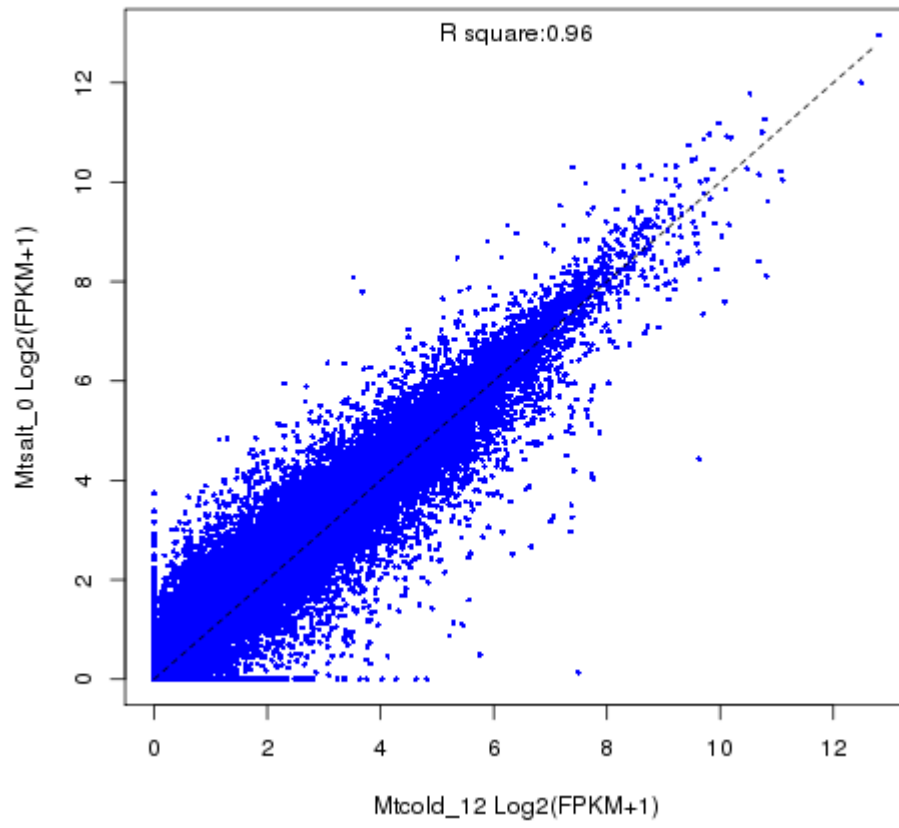

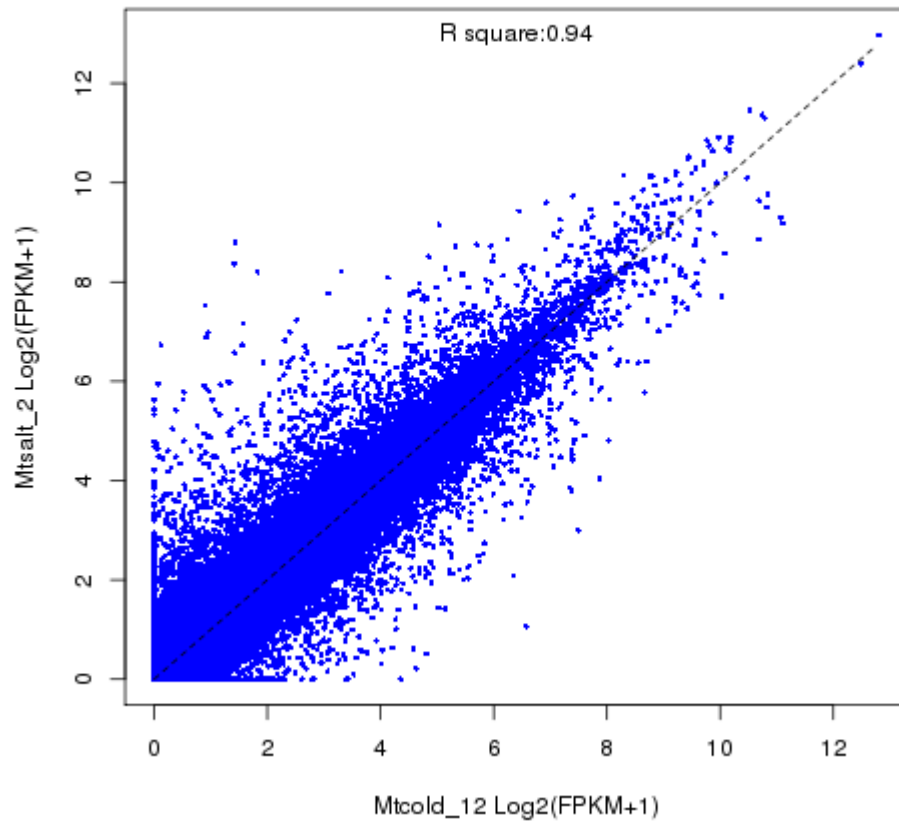

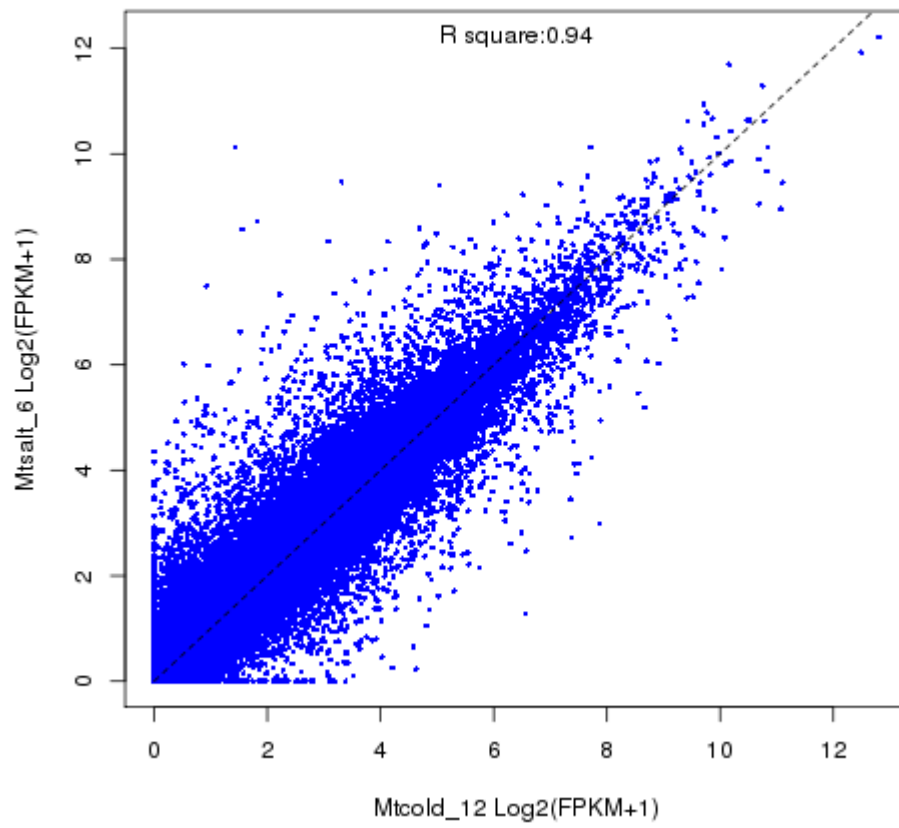

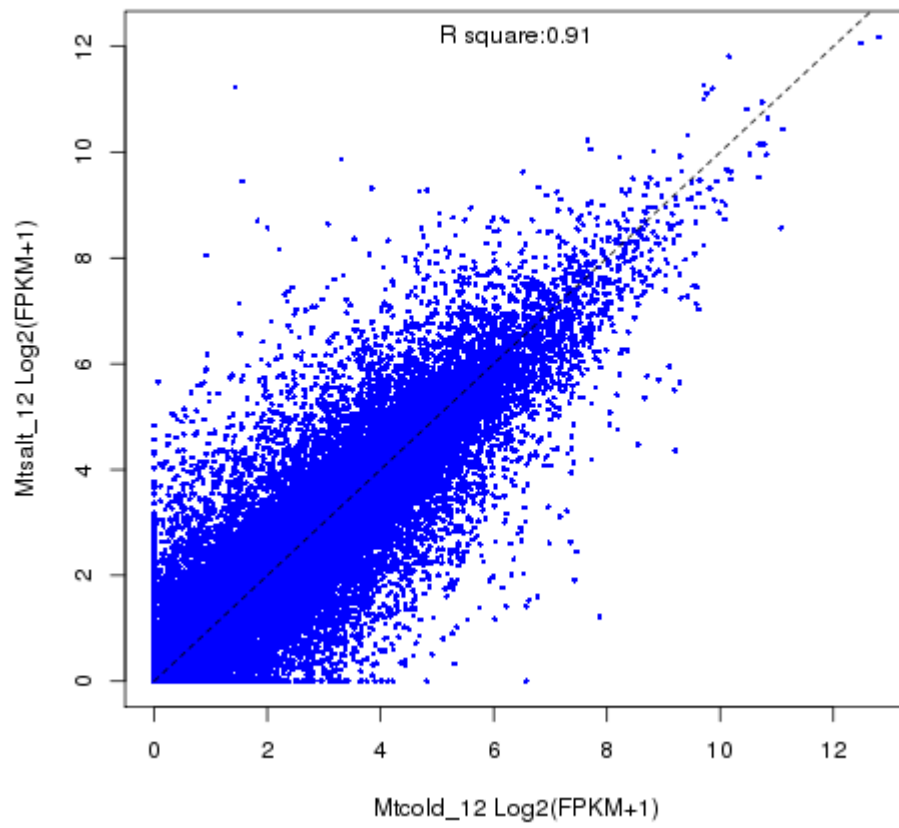



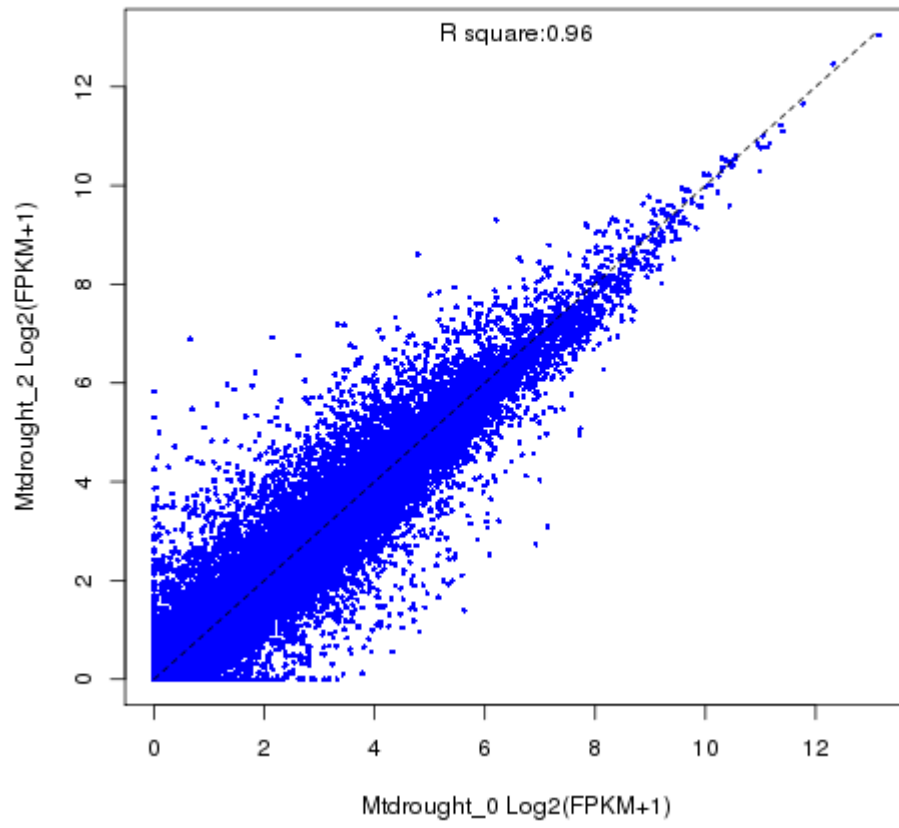

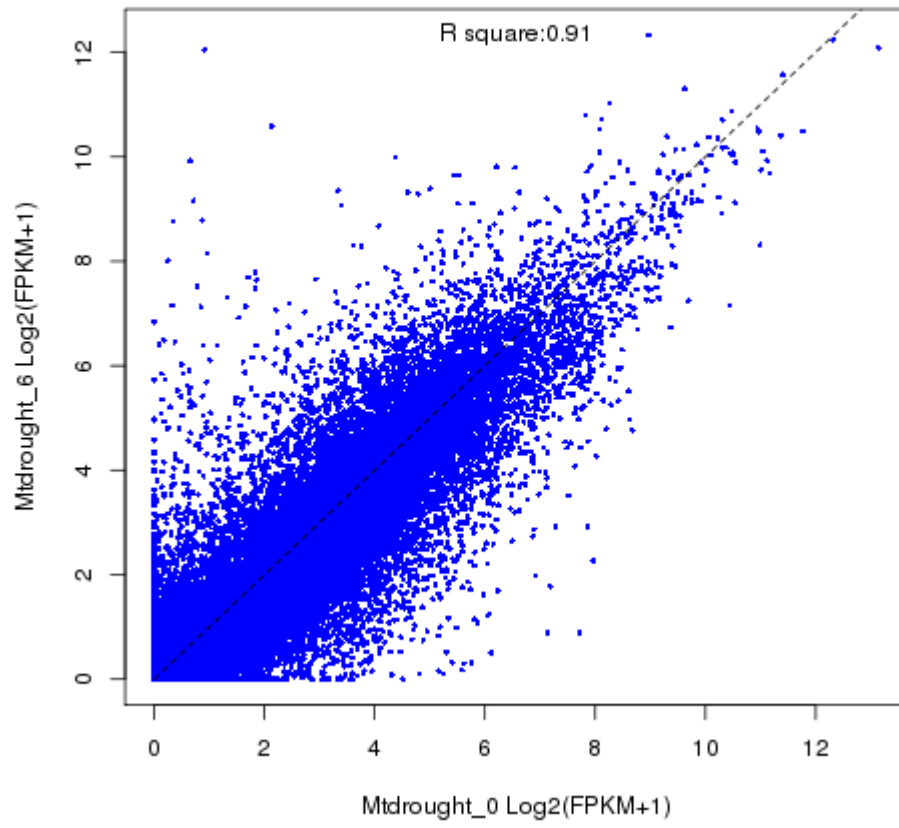

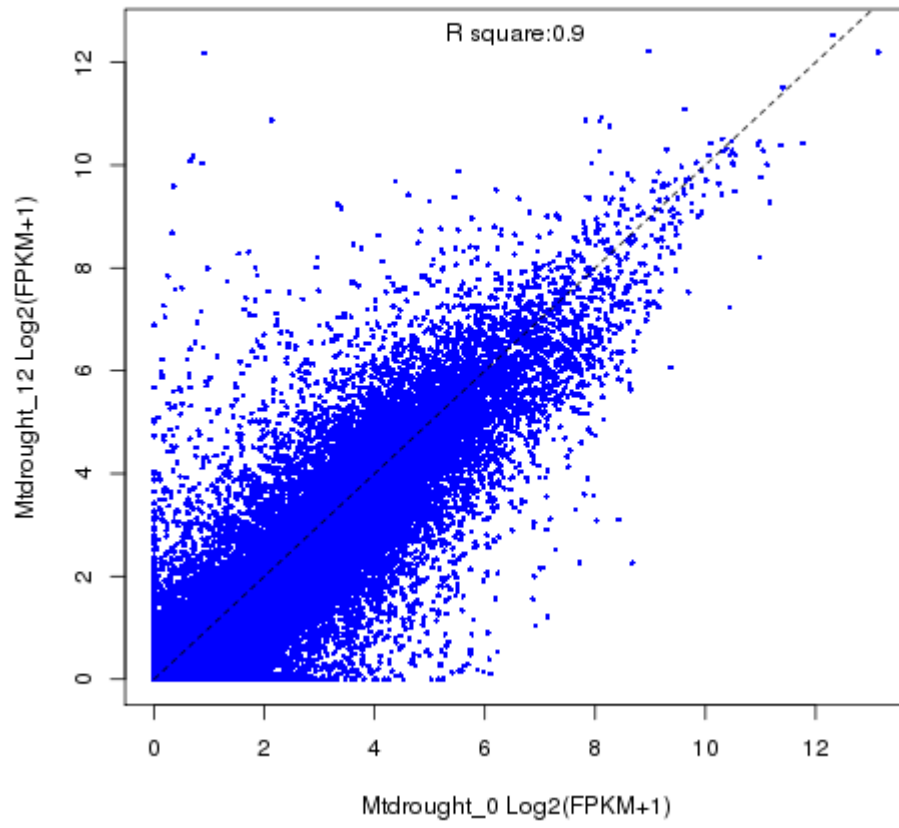

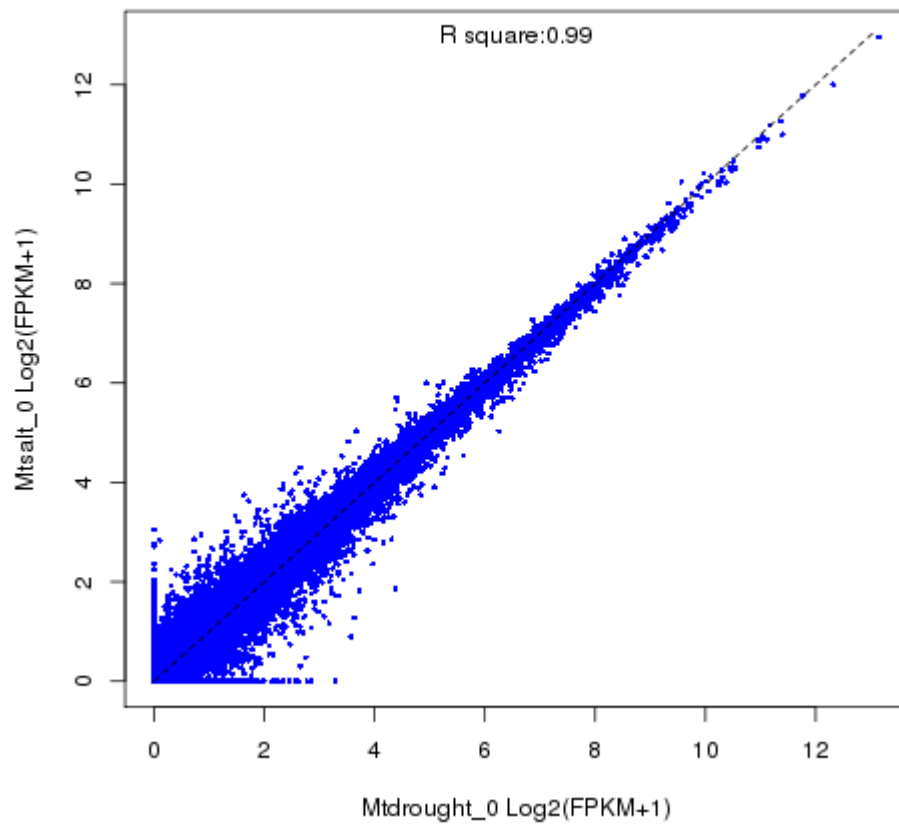

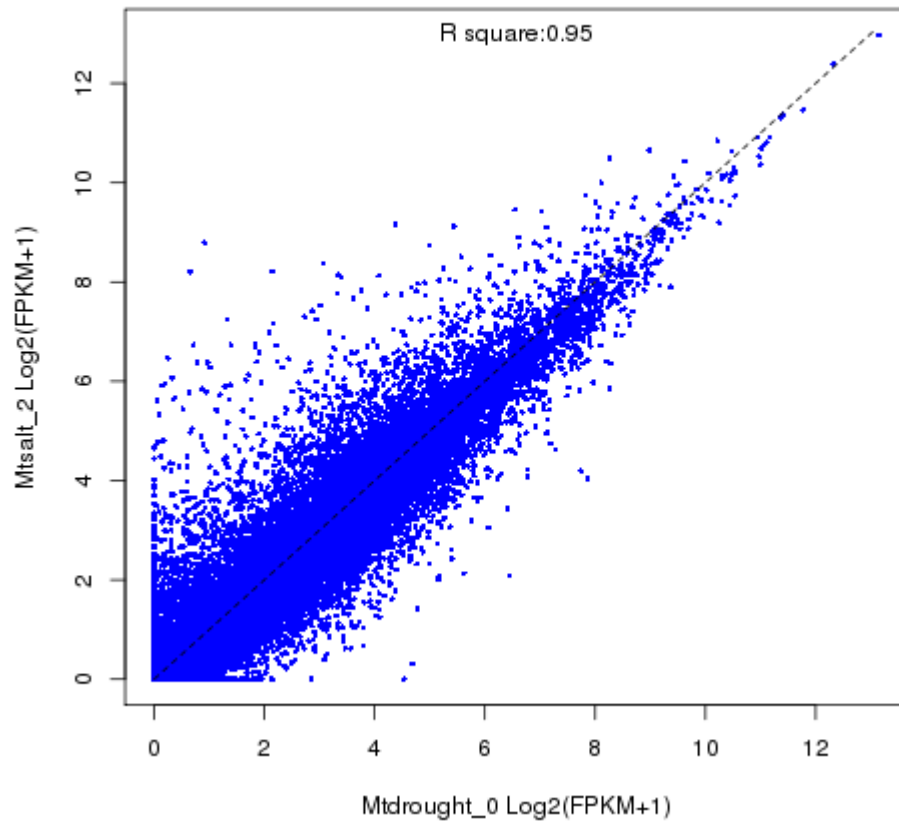

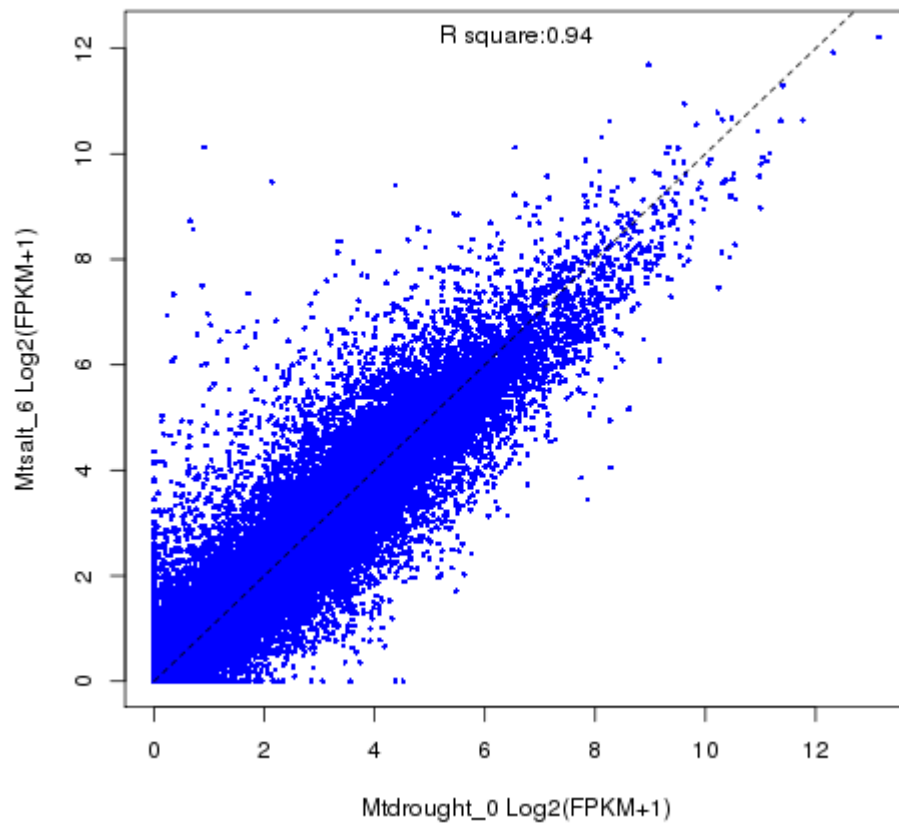

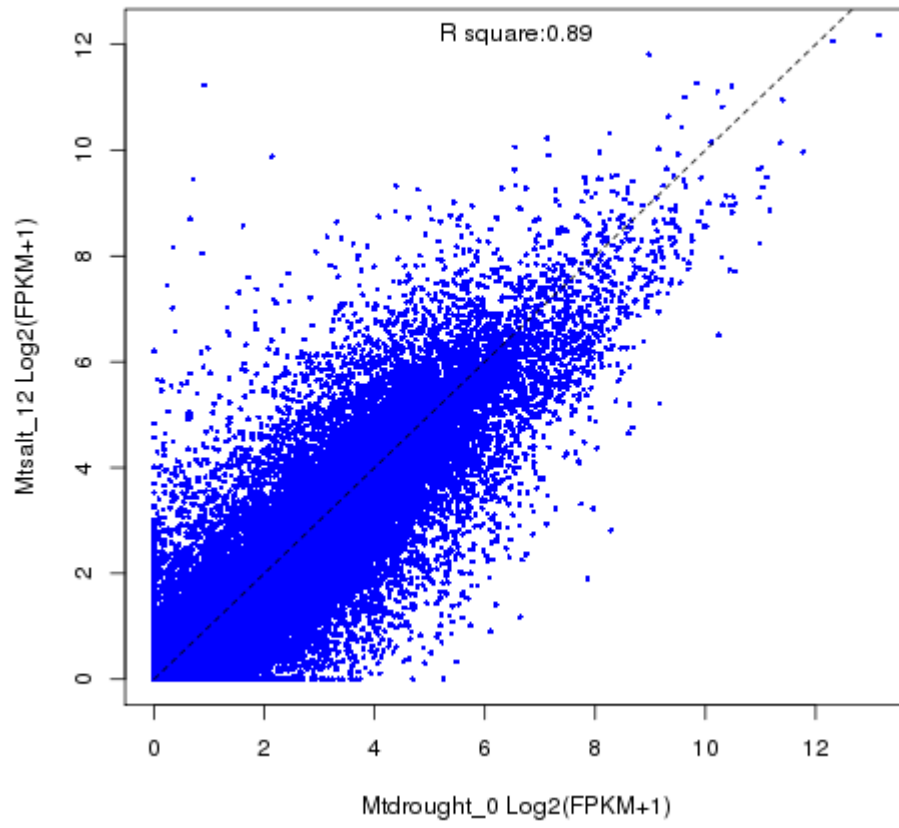

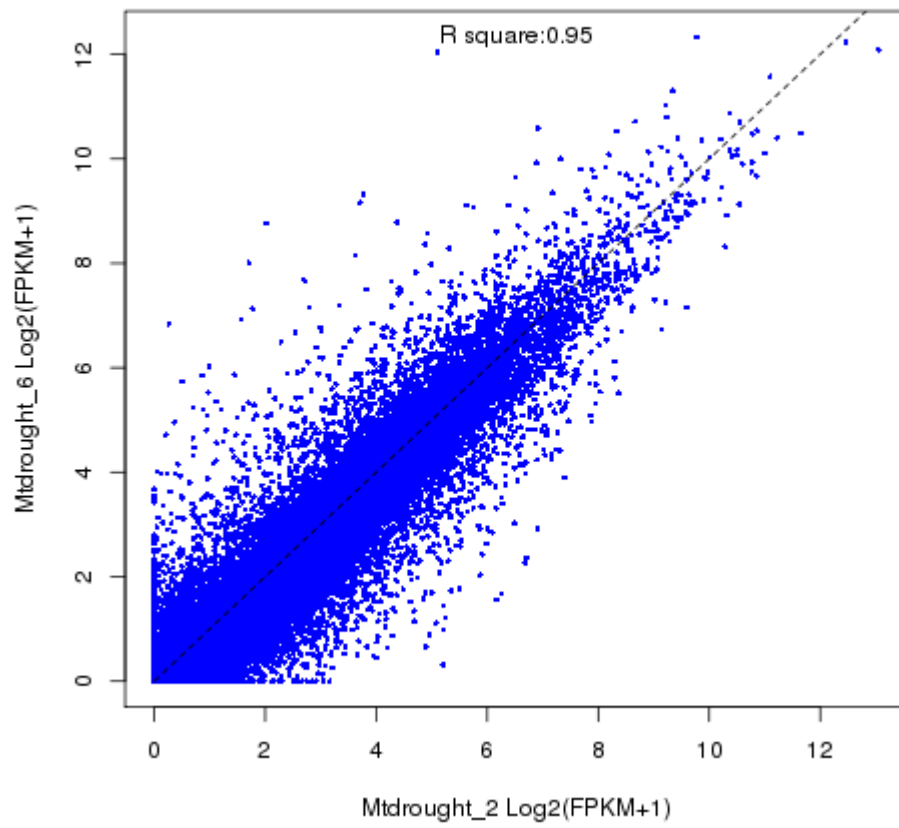



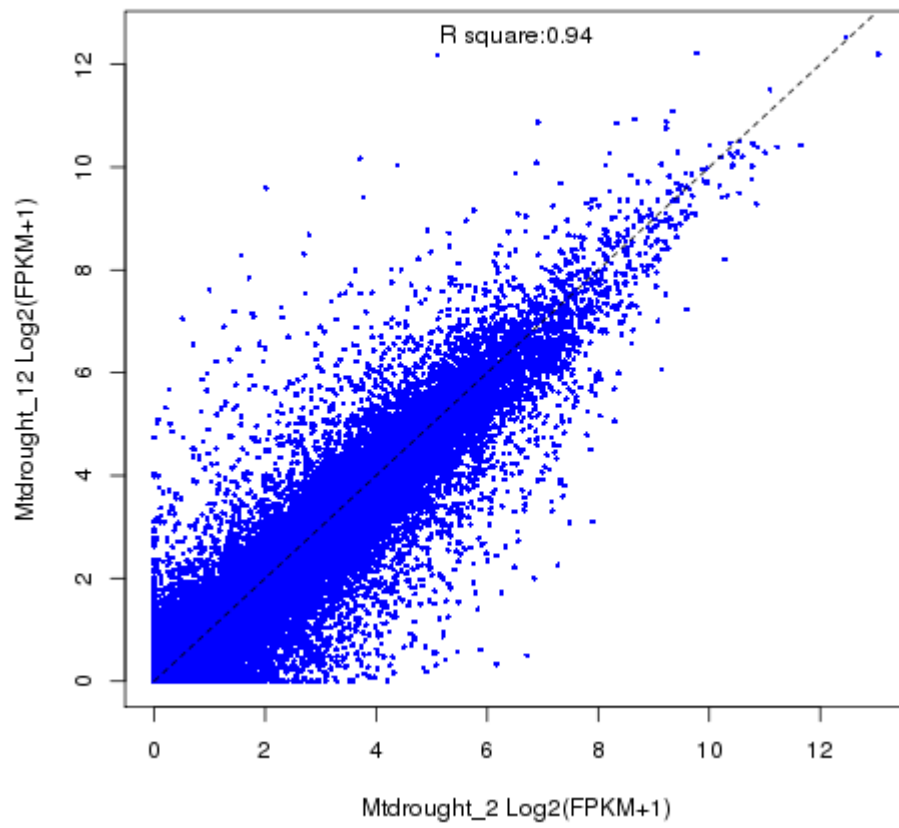

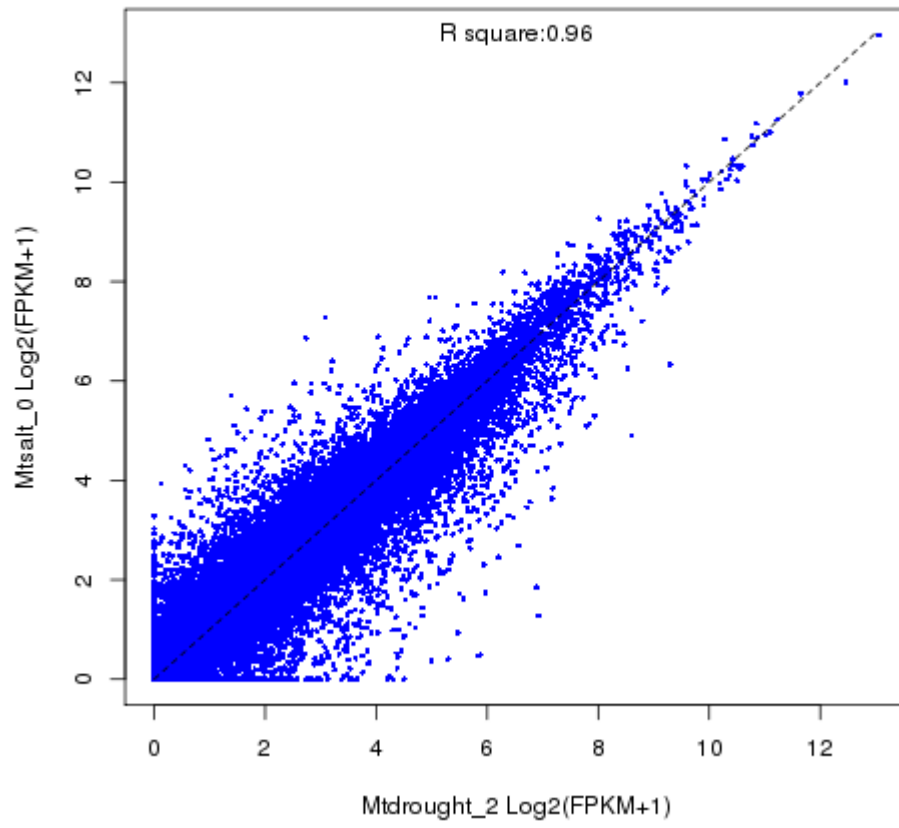

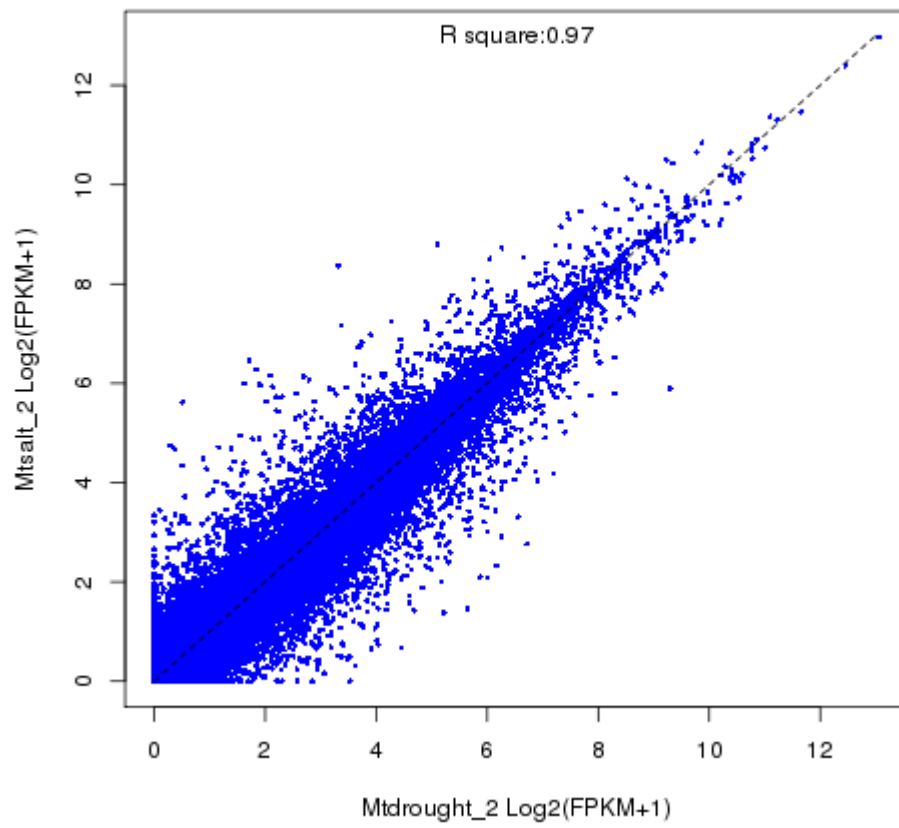

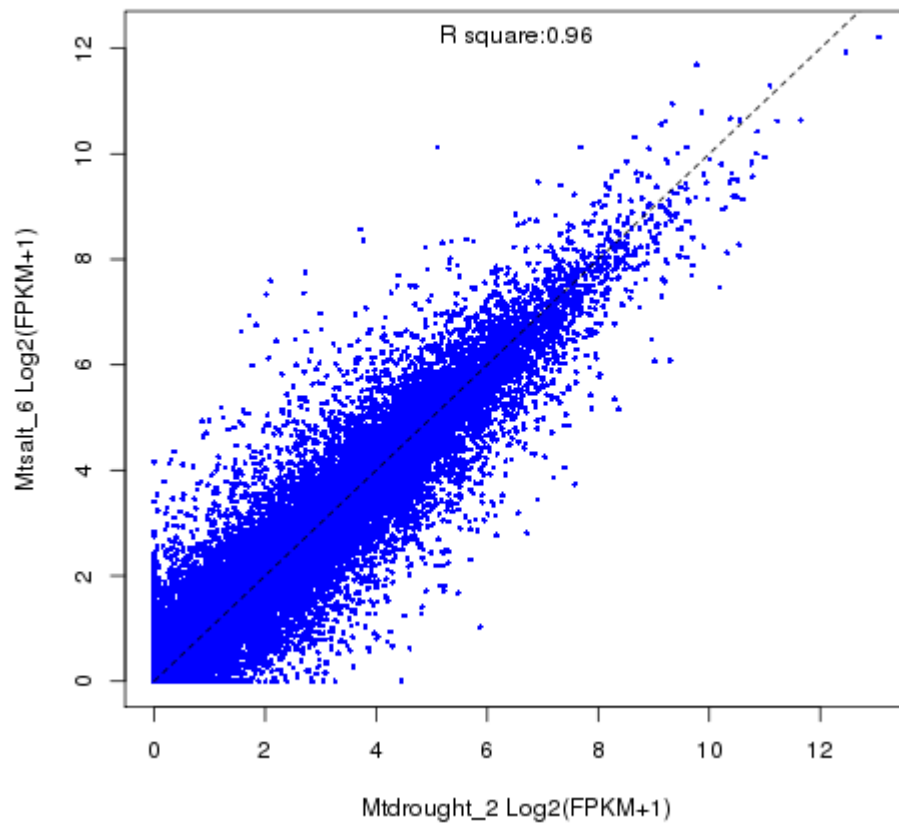

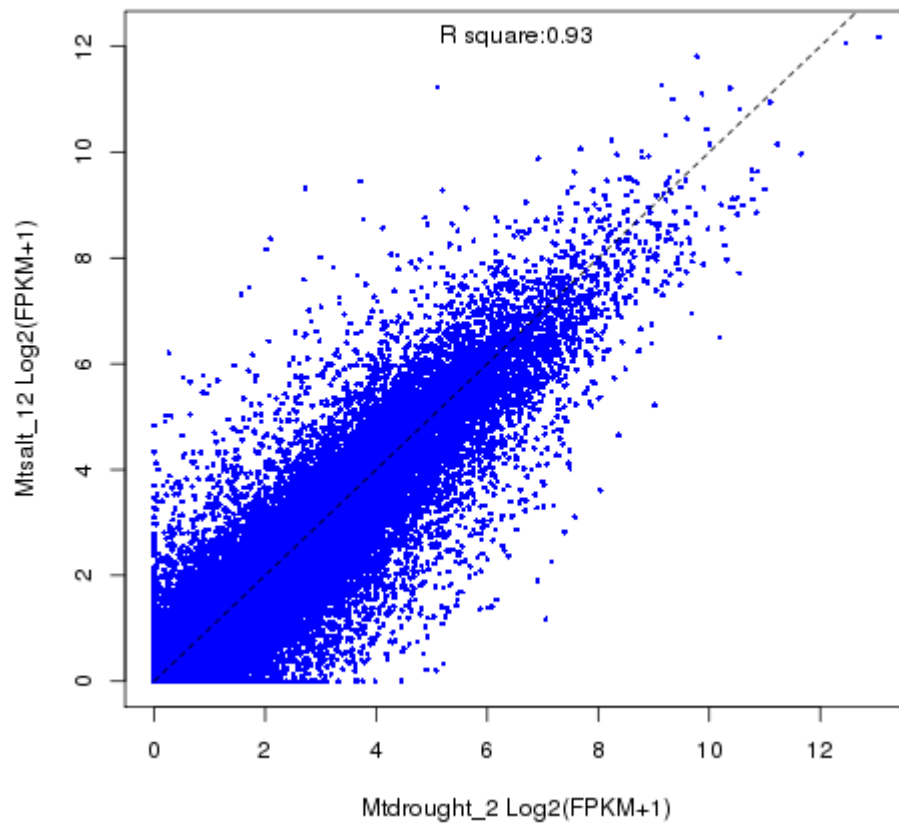

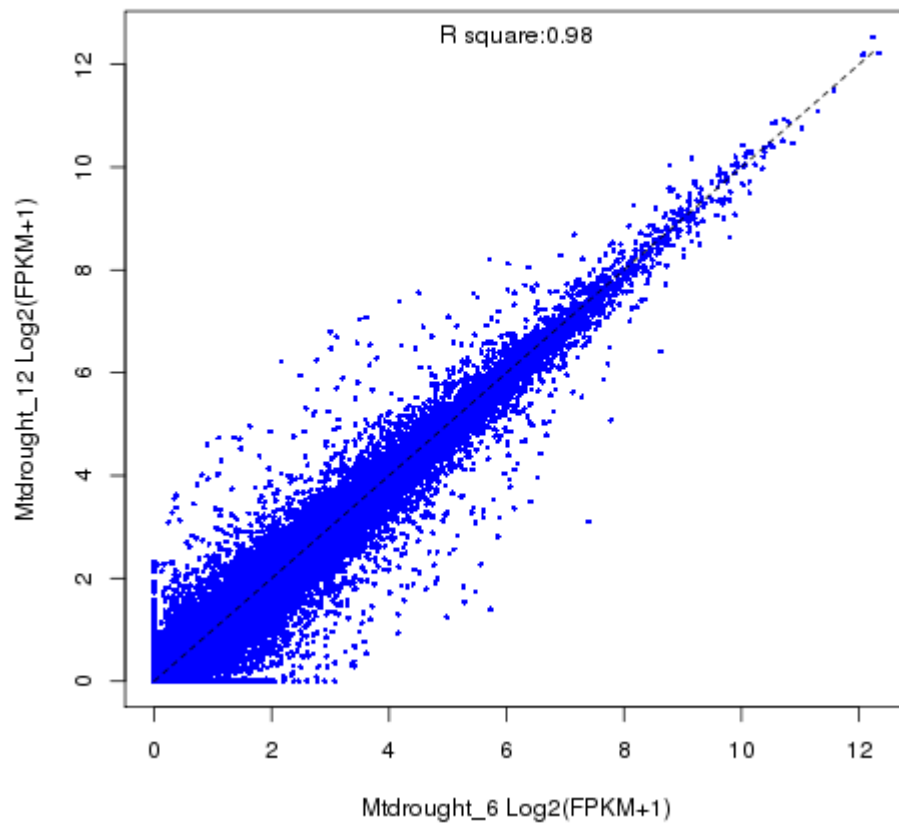

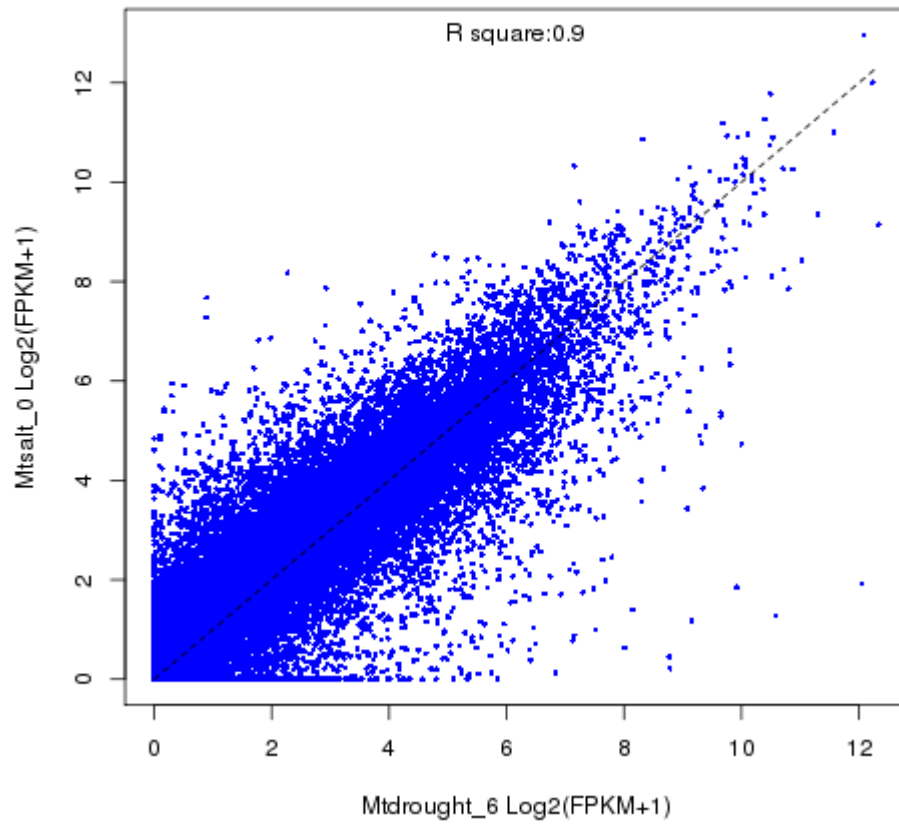

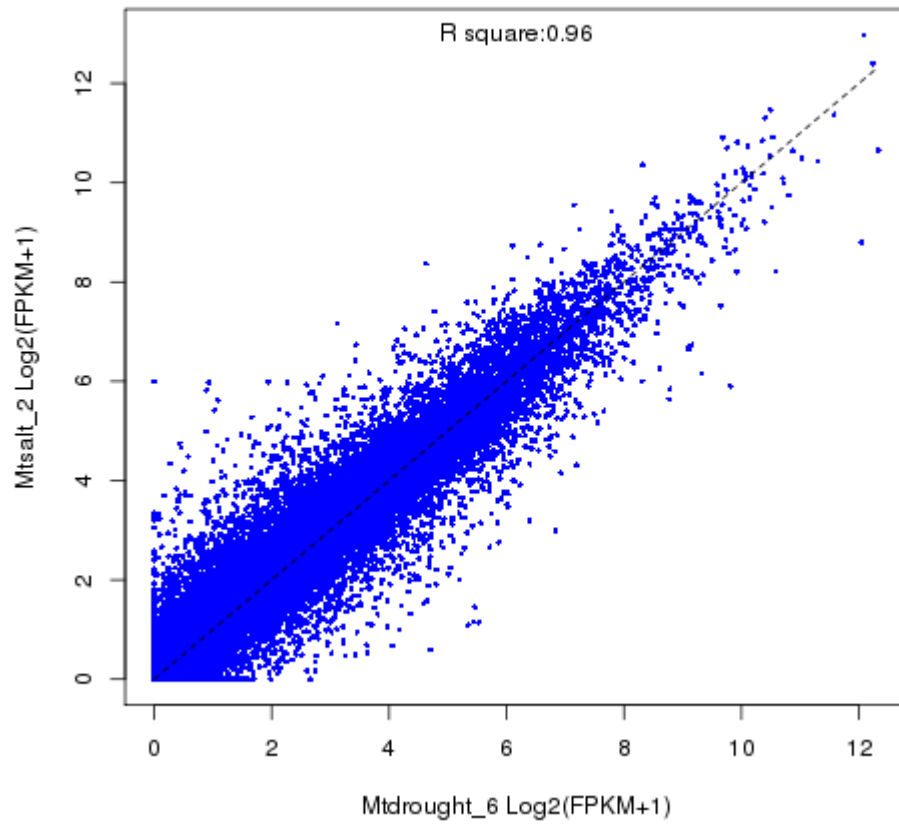



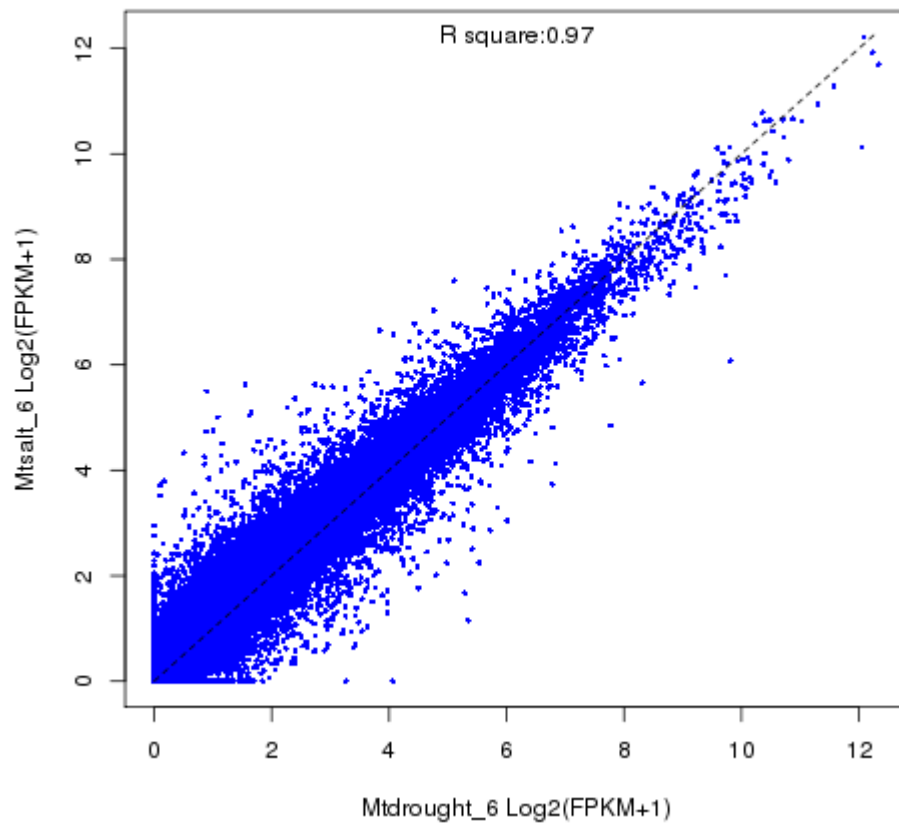

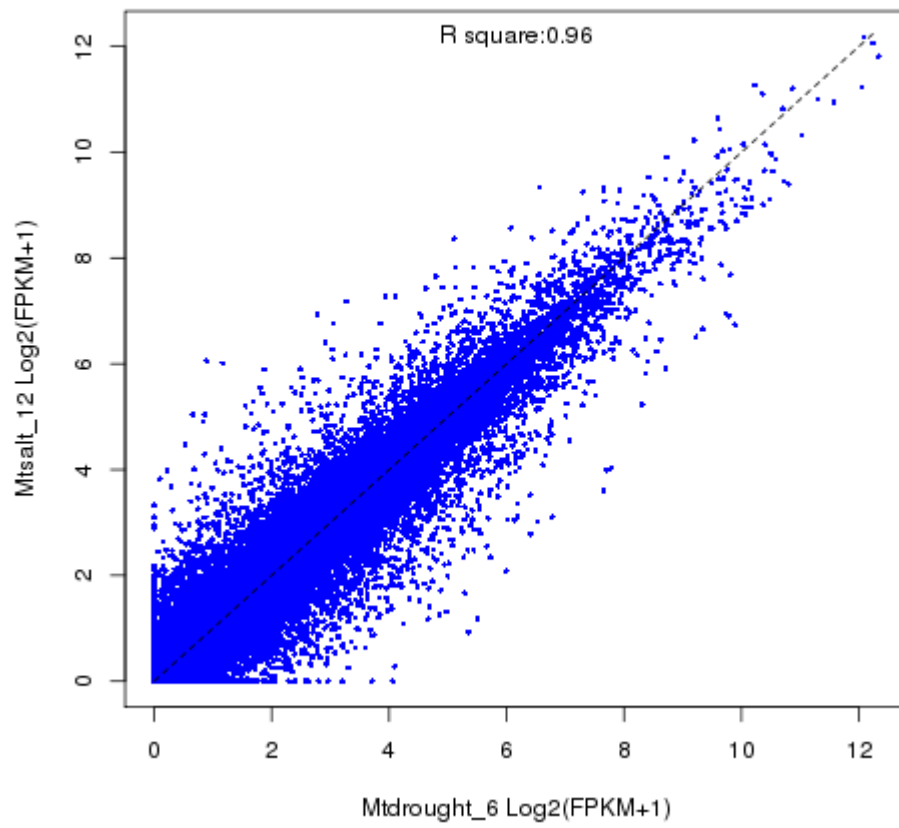

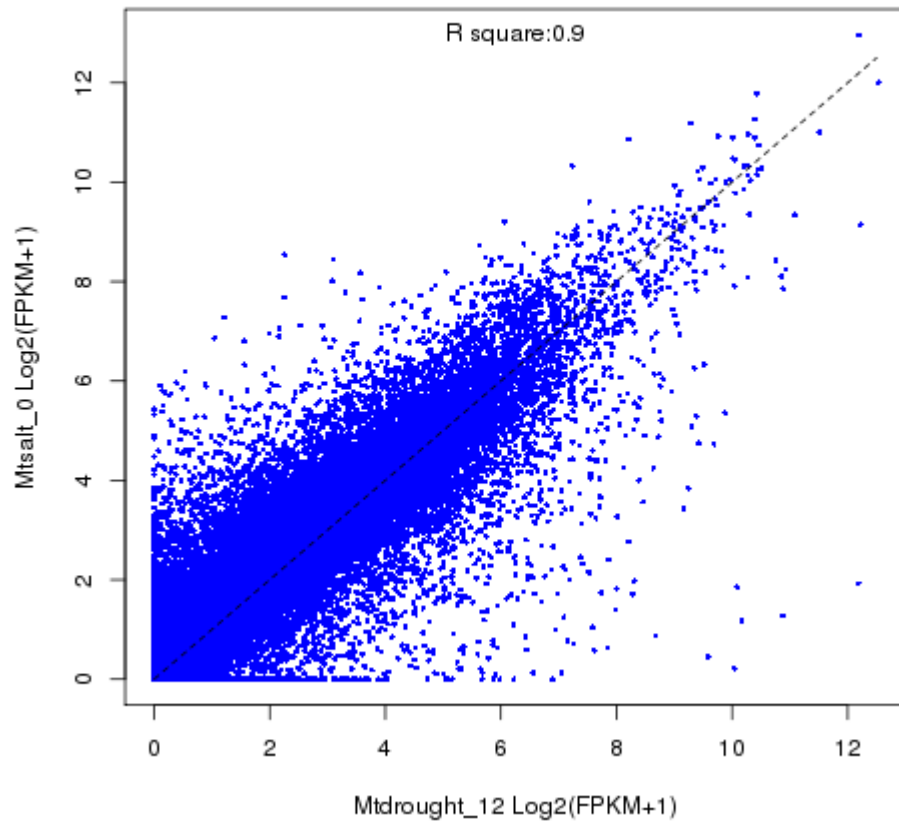

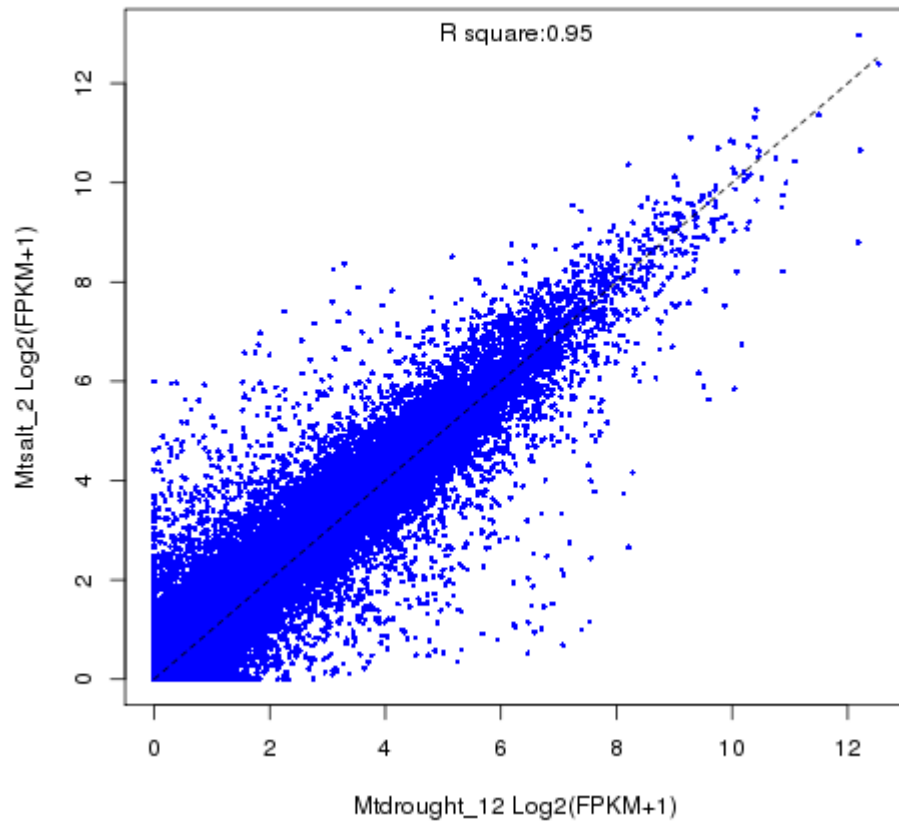

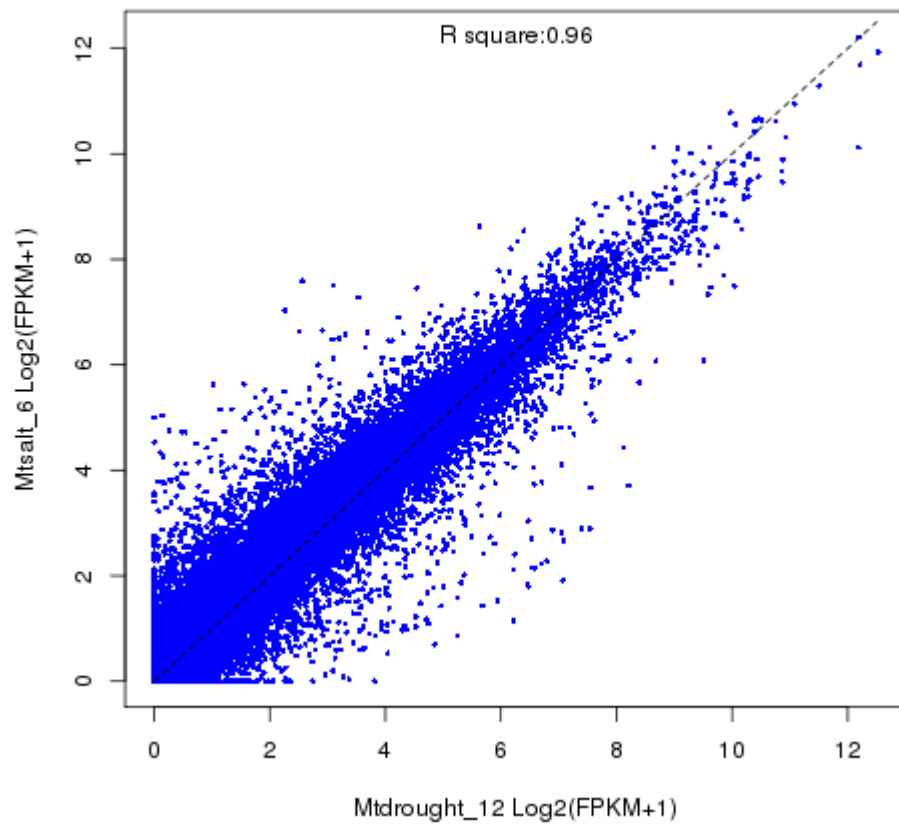

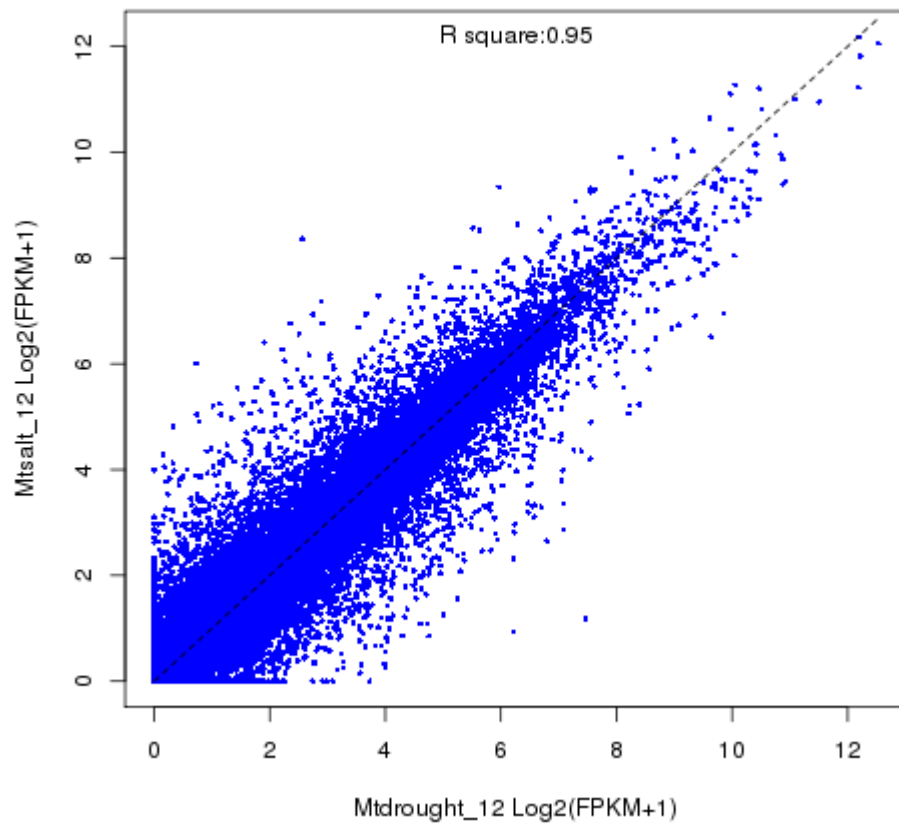

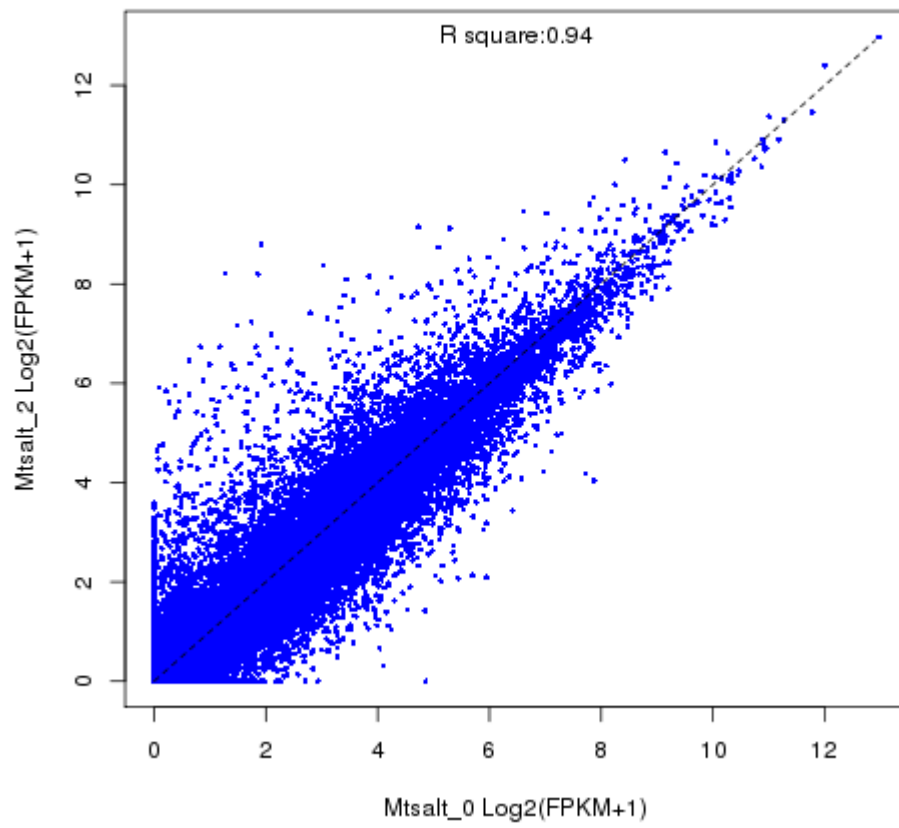

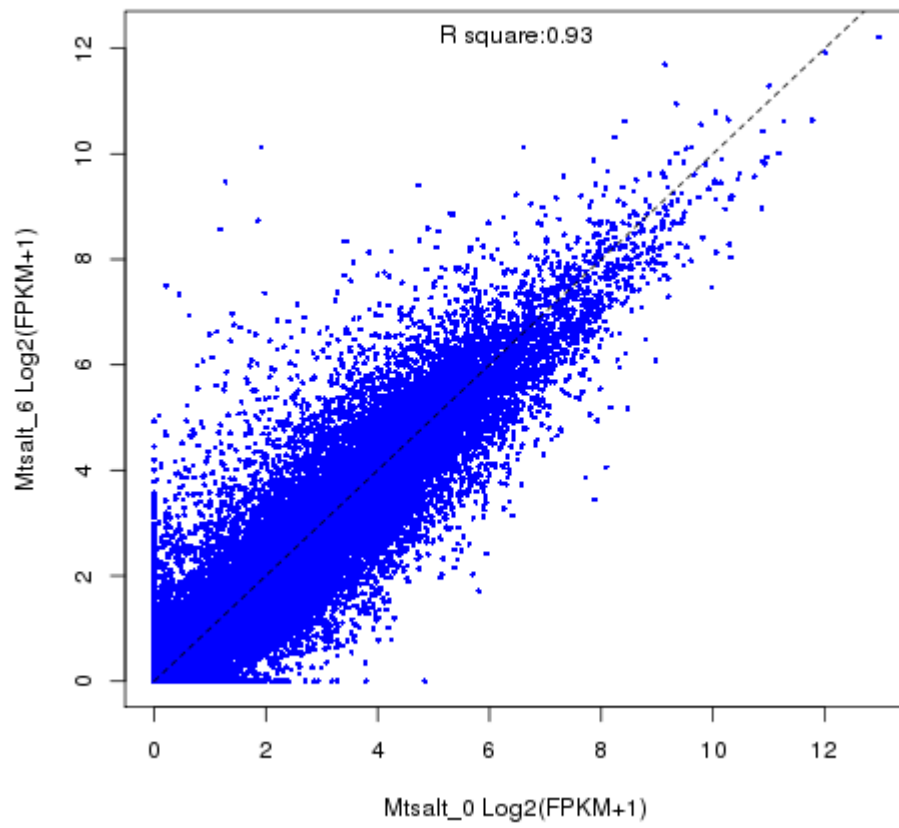



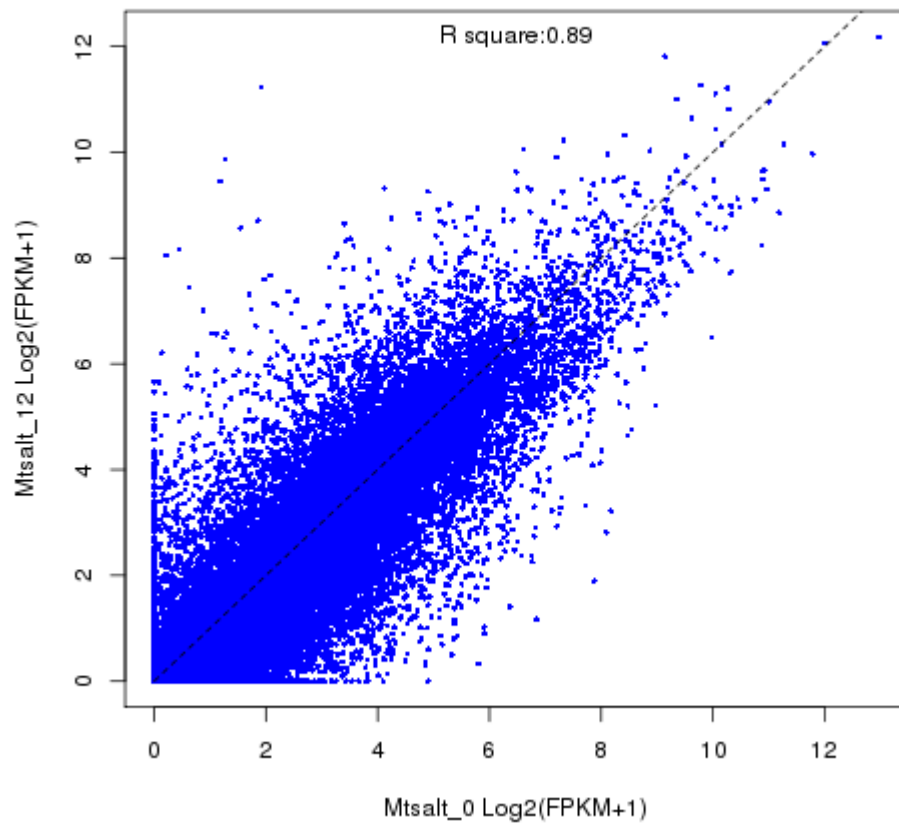

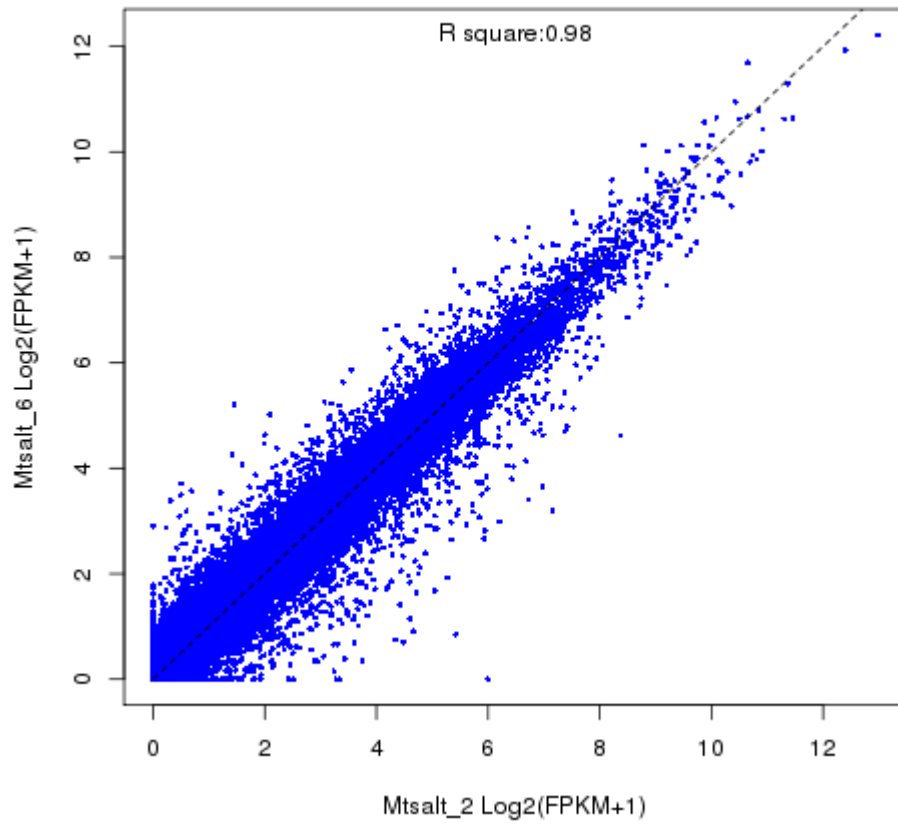

S3 Fig. Abundance of transcriptions between two samples
